# Supplementary material for: An efficient approach for enhancing the catalytic activity of Ni-MOF-74 via a relay catalyst system for the selective oxidation of benzylic C–H bonds under mild conditions
Source: Royal Society of Chemistry journal article supplement (doi:10.1039/c7cc09602j), 2018-01-01

## Supporting Information

### **An efficient approach for enhancing the catalytic activity of Ni-MOF-74 via a relay catalyst system for the selective oxidation of benzylic C–H bond under mild conditions**

Changyan Guo<sup>a</sup>, Yonghong Zhang<sup>a\*</sup>, Yi Zhang<sup>b</sup>, Jide Wang<sup>a\*</sup>

<sup>a</sup> Key Laboratory of Oil and Gas Fine Chemicals, Ministry of Education & Xinjiang Uygur Autonomous Region, College of Chemistry and Chemical Engineering of Xinjiang University, Urumqi 830046, P. R. China.

<sup>b</sup> Key Laboratory of Resources Chemistry of Nonferrous Metals (Ministry of Education), College of Chemistry and Chemical Engineering, Central South University, Changsha, 410083, China

E-mail addresses: [zhzhzyh@126.com](mailto:zhzhzyh@126.com) (Yonghong Zhang); [awangjd@sina.cn](mailto:awangjd@sina.cn) (Jide Wang).

#### **Index**

|                                                                   |    |
|-------------------------------------------------------------------|----|
| 1. General Information .....                                      | 2  |
| 1.1. Materials and Reagents .....                                 | 2  |
| 1.2. Materials Characterization .....                             | 2  |
| 2. Optimization of Reaction Conditions.....                       | 4  |
| 3. Control Experiments .....                                      | 5  |
| 4. Experimental section.....                                      | 6  |
| 4.1 Preparation of Ni-MOF-74.....                                 | 6  |
| 4.2 Catalytic studies .....                                       | 6  |
| 4.3 The Synthetic Procedure and Data for Products .....           | 7  |
| 4.4 Gram Scale Experiments.....                                   | 20 |
| 4.5 Recycling Experiment.....                                     | 21 |
| 4.6 Control Experiments on the Reaction Mechanism.....            | 23 |
| 4.6.1 The Influence of O <sub>2</sub> on the Reaction .....       | 23 |
| 4.6.2 The Influence of H <sub>2</sub> O on the Reaction .....     | 24 |
| 4.6.3 Radical Trapping Experiments .....                          | 25 |
| 4.6.4 The Influence of Oxidants on the Reaction.....              | 26 |
| 4.6.5 Phenyl( <i>p</i> -tolyl)methanol Oxidation Experiment ..... | 27 |
| 4.6.6 (Bromomethylene)dibenzene Oxidation Experiment.....         | 28 |
| 4.6.7 Competition Experiments.....                                | 29 |
| 5. Spectra of SEM, PXRD, TGA and FT-IR of NI-MOF-74.....          | 30 |
| 6. Copies of <sup>1</sup> H NMR and MS .....                      | 32 |

## **1. General Information**

### **1.1. Materials and Reagents**

Nickel(II) nitrate hexahydrate ( $\text{Ni}(\text{NO}_3)_2 \cdot 6\text{H}_2\text{O}$ ), 2,5-dihydroxyterephthalic acid ( $\text{H}_4\text{dhtp}$ ), *N,N*-dimethylformamide (DMF), Ethanol (EtOH), diphenylmethane, 3-dihydro-1*H*-indene, ethyl benzene and its derivatives, toluene and its derivatives were purchased from Adamas-beta and Sigma-Aldrich. All chemicals were used without further purification.

### **1.2. Materials Characterization**

#### **XRD:**

The product was characterized by XRD using a Rigaku D/max-ga X-ray diffractometer at a scan rate of  $6^\circ \text{min}^{-1}$  in  $2\theta$  ranging from  $5^\circ$  to  $40^\circ$  with  $\text{Cu K}\alpha$  radiation ( $\lambda = 1.54178 \text{ \AA}$ ).

#### **SEM:**

Scanning electron microscopy (SEM) was conducted on a Hitachi S-8010 with an accelerating voltage of 100 kV.

#### **IR:**

FT-IR spectra were obtained with a Bruker EQUINOX-55 spectrophotometer within the wavenumber interval of  $400\text{-}4000 \text{ cm}^{-1}$ .

Thermogravimetric analysis (TGA) was performed on a Shimadzu DTG-50 thermal analyzer from room temperature to  $800^\circ\text{C}$  at a heating rate of  $10^\circ\text{C min}^{-1}$  under an air atmosphere.

#### **Gas chromatographic:**

Gas chromatographic (GC) analyses were performed using a Shi-madzu GC 2010-Plus equipped with a flame ionization detector (FID) and an SPB-5 column (length = 30 m, inner diameter = 0.25 mm, and film thickness = 0.25  $\mu\text{m}$ ). The temperature program for GC analysis held samples at  $100^\circ\text{C}$  for 1 min, heated them from  $100$  to  $280^\circ\text{C}$  at  $20^\circ\text{C /min}$ , and held them at  $280^\circ\text{C}$  for 5 min. Inlet and detector temperatures were set constant at  $280^\circ\text{C}$ .

**GC–MS:**

GC–MS analyses were performed using a Shimadzu GCMS-QP2010 Ultra with a ZB-5MS column (length = 30 m, inner diameter = 0.25 mm, and film thickness = 0.25  $\mu\text{m}$ ). The temperature program for GC–MS analysis held samples at 100 °C for 1 min, heated samples from 100 to 250 °C at 20 °C /min and held them at 250 °C for 5 min. Inlet temperature was set constant at 250 °C. MS spectra were compared with the spectra gathered in the NIST library.

**NMR spectrum:**

$^1\text{H}$  NMR spectra were collected on 400 MHz NMR spectrometers (Varian Inova-400) using  $\text{CDCl}_3$  or  $\text{DMSO-}d_6$ . Chemical shifts are reported in parts per million (ppm). Chemical shifts for protons are reported in parts per million downfield and are referenced to residual protium in the NMR solvent ( $\text{CHCl}_3 = \delta 7.26$ ). Data are represented as follows: chemical shift, multiplicity (br = broad, s = singlet, d = doublet, t = triplet, q = quartet, m = multiplet), coupling constants in Hertz (Hz), integration.

**Chromatography:**

Column chromatography was performed with silica gel (200-300 mesh ASTM).

## 2. Optimization of Reaction Conditions

Table S1 Optimization of reaction conditions.<sup>a</sup>

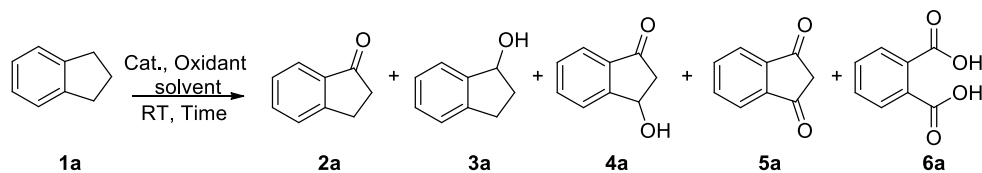

| Entry | Catalyst                                             | IL                    | Con. (%) | Yield (%) <sup>b</sup> |    |                 |    |    |
|-------|------------------------------------------------------|-----------------------|----------|------------------------|----|-----------------|----|----|
|       |                                                      |                       |          | 2a                     | 3a | 4a              | 5a | 6a |
| 1     | —                                                    | [bmim]Br              | 31       | 24                     | 6  | nd <sup>c</sup> | nd | 1  |
| 2     | Ni-MOF-74                                            | —                     | 2        | 2                      | nd | nd              | nd | nd |
| 3     | Ni-MOF-74                                            | [bmim]Br              | 96       | 87                     | 3  | 3               | 2  | 1  |
| 4     | Co-MOF-74                                            | —                     | 54       | 32                     | 10 | 1               | 1  | nd |
| 5     | Co-MOF-74                                            | [bmim]Br              | 92       | 75                     | 9  | 2               | 3  | 3  |
| 6     | Mn-MOF-74                                            | —                     | 80       | 61                     | 14 | 1               | 2  | 2  |
| 7     | Mn-MOF-74                                            | [bmim]Br              | 94       | 85                     | 4  | 3               | 1  | 1  |
| 8     | Mg-MOF-74                                            | —                     | 1        | 1                      | nd | nd              | nd | nd |
| 9     | Mg-MOF-74                                            | [bmim]Br              | 74       | 65                     | 9  | nd              | nd | nd |
| 10    | Zn-MOF-74                                            | —                     | 2        | 2                      | nd | nd              | nd | nd |
| 11    | Zn-MOF-74                                            | [bmim]Br              | 59       | 50                     | 8  | 1               | nd | nd |
| 12    | Ni(NO <sub>3</sub> ) <sub>2</sub> ·6H <sub>2</sub> O | —                     | 28       | 22                     | 6  | nd              | nd | nd |
| 13    | Ni(NO <sub>3</sub> ) <sub>2</sub> ·6H <sub>2</sub> O | [bmim]Br              | 95       | 90                     | 1  | 1               | 2  | 1  |
| 14    | Ni(Ac) <sub>2</sub> ·4H <sub>2</sub> O               | —                     | 10       | 9                      | 1  | nd              | nd | nd |
| 15    | Ni(Ac) <sub>2</sub> ·4H <sub>2</sub> O               | [bmim]Br              | 95       | 85                     | 4  | 2               | 3  | 1  |
| 16    | NiCl <sub>2</sub> ·6H <sub>2</sub> O                 | —                     | 21       | 17                     | 4  | nd              | nd | nd |
| 17    | Ni Cl <sub>2</sub> ·6H <sub>2</sub> O                | [bmim]Br              | 81       | 70                     | 7  | 1               | 1  | 2  |
| 18    | Ni-MOF-74                                            | [bbim]Br              | 82       | 73                     | 6  | 1               | 2  | nd |
| 19    | Ni-MOF-74                                            | [emim]Br              | 91       | 80                     | 5  | 2               | 3  | 1  |
| 20    | Ni-MOF-74                                            | [beim]Br              | 83       | 71                     | 8  | 1               | 2  | 1  |
| 21    | Ni-MOF-74                                            | [bmim]Cl              | 4        | 4                      | nd | nd              | nd | nd |
| 22    | Ni-MOF-74                                            | [bmim]I               | 3        | 3                      | nd | nd              | nd | nd |
| 23    | Ni-MOF-74                                            | [bmim]BF <sub>4</sub> | 56       | 42                     | 13 | nd              | nd | 1  |
| 24    | Ni-MOF-74                                            | [bmim]PF <sub>6</sub> | 8        | 6                      | 1  | nd              | 1  | nd |

<sup>a</sup> Conditions: **1a** (0.2 mmol), cat. (5 mg), IL (50  $\mu$ L), TBHP (0.8 mmol), room temperature, 12

h. <sup>b</sup> Conversion and yield are determined by GC. <sup>c</sup> nd = No detected.

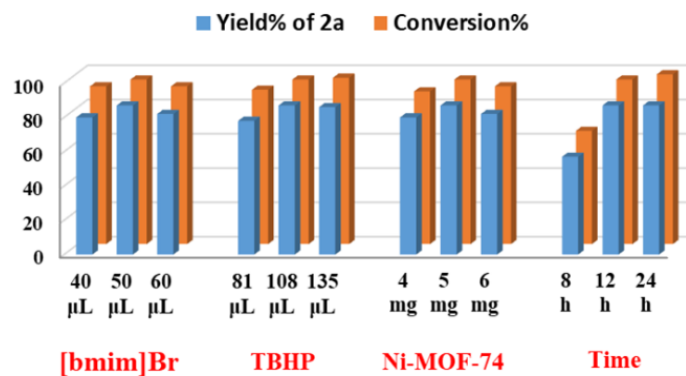

Fig. S1 Effect of the dosage of ILs, oxidant, catalyst and reaction time on the reaction.

### 3. Control Experiments

Table S2 Control experiments.

| Entry           | Oxidant                     | Atmosphere     | Additive         | Yield/% <sup>a</sup> |
|-----------------|-----------------------------|----------------|------------------|----------------------|
| 1               | TBHP                        | N <sub>2</sub> | -                | 92                   |
| 2               | Anhydrous TBHP              | air            | -                | 88                   |
| 3               | TBHP                        | air            | TEMPO (4 equiv.) | Trace                |
| 4               | TBHP                        | air            | BHT (4 equiv.)   | Trace                |
| 5               | TBHP                        | air            | DPE (4 equiv.)   | 36                   |
| 6               | <i>t</i> -BuOO <i>t</i> -Bu | air            | -                | Trace                |
| 7               | CumOOCum                    | air            | -                | Trace                |
| 8               | BPO                         | air            | -                | Trace                |
| 9               | CumOOH                      | air            | -                | 49                   |
| 10 <sup>b</sup> | TBHP                        | air            | KBr (1 equiv.)   | 47                   |

<sup>a</sup> Yield was determined by GC. <sup>b</sup> Without [bmim]Br.

(a)

(b)

(c)

(d)

## 4. Experimental section

### 4.1 Preparation of Ni-MOF-74

Ni-MOF-74 was synthesized according to the procedure reported by Matzger and co-workers.<sup>1</sup> In a typical procedure, a solid mixture of H<sub>4</sub>dhtp (0.48 g, 2.41 mmol) and Ni(NO<sub>3</sub>)<sub>2</sub> · 6H<sub>2</sub>O (2.38 g, 8.18 mmol) was added to a 1:1:1 (v/v/v) mixture of DMF/EtOH/H<sub>2</sub>O (50 mL) in a 100 mL screw cap jar. The suspension was mixed and stirred at room temperature until homogeneous. The reaction solution was then transferred to a 100 mL Teflon-sealed and placed in an oven at 100 °C for 24 h. After the reaction reached completion, the solid was isolated by centrifugation and washed with DMF three times, and then two more times with 20 mL of methanol. The solid product was kept immersed in methanol for 6 days, fresh solvent was added three times after solid decanting during this period. Methanol was finally removed under high vacuum at 150 °C, yielding the Ni-MOF-74 with headings as appropriate.

### 4.2 Catalytic studies

The catalytic oxidation was carried out in a glass tube equipped with a magnetic stirrer. In a typical reaction, the mixture of Ni-MOF-74 (5 mg, 8 mol%), *tert*-butyl hydroperoxide 70% in water (108 μL, 0.8 mmol), [bmim]Br (50 μL, 0.18 mmol) and benzyl hydrocarbons substrates (0.2 mmol) were added into the tube, and stirred for 12 h at room temperature. After the reaction reached completion, the reaction mixture was extracted with ethyl acetate and then the solid catalyst was filtered. The filtrate mixture was evaporated under vacuum and purified by flash column chromatography (petroleum ether/ethyl acetate 100:1 to ethyl acetate) to afford the desired product ketones or carboxylic acids. The product identity was further confirmed by <sup>1</sup>H NMR and GC-MS.

### 4.3 The Synthetic Procedure and Data for Products

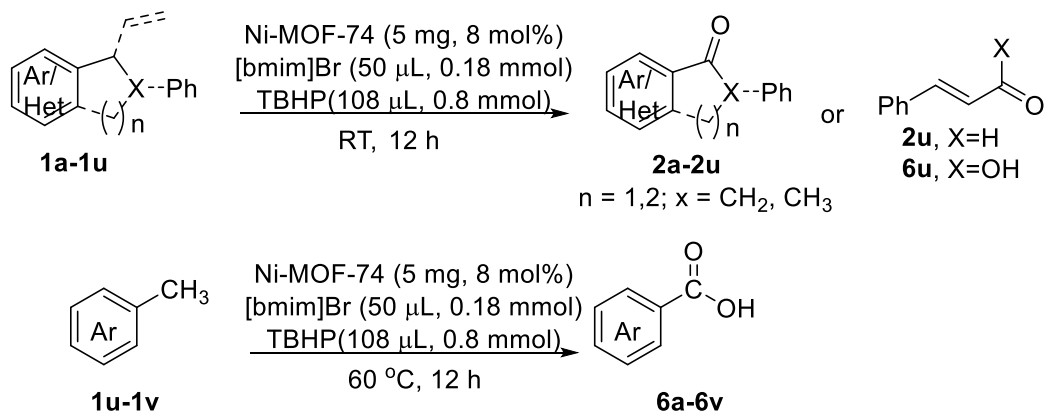

A mixture of Ni-MOF-74 (5 mg, 8 mol%), *tert*-butyl hydroperoxide 70% in water (108  $\mu$ L, 0.8 mmol), [bmim]Br (50  $\mu$ L, 0.18 mmol) and benzyl aromatic hydrocarbons substrates (0.2 mmol) were added into the tube, and stirred for 12 h at room temperature. After the reaction reached completion, the reaction mixture was extracted with ethyl acetate and then the solid catalyst was filtered. The filtrate mixture was evaporated under vacuum and purified by flash column chromatography (petroleum ether/ethyl acetate 100:1 to ethyl acetate) to afford the desired product ketones or carboxylic acids.

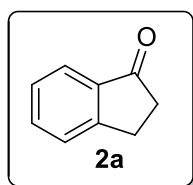

A mixture of Ni-MOF-74 (5 mg, 8 mol%), *tert*-butyl hydroperoxide 70% in water (108  $\mu$ L, 0.8 mmol), [bmim]Br (50  $\mu$ L, 0.18 mmol) and 2,3-dihydro-1*H*-indene (23.6 mg, 0.2 mmol) were added into the tube, and stirred for 12 h at room temperature. After the reaction reached completion, the reaction mixture was extracted with ethyl acetate and then the solid catalyst was filtered. The filtrate mixture was evaporated under vacuum and purified by flash column chromatography (petroleum ether/ethyl acetate 100:1) to afford the desired product 2,3-dihydro-1*H*-inden-1-one (**2a**), 84% isolated yield, colorless oil. <sup>1</sup>H NMR (400 MHz, CDCl<sub>3</sub>)  $\delta$  7.77 (d, *J* = 8.0 Hz, 1H), 7.59-7.57 (m, 1H), 7.48 (d, *J* = 8.0 Hz, 1H), 7.39-7.36 (m, 1H), 3.17-3.14 (m, 2H),

2.71-2.68 (m, 2H). MS: 132.

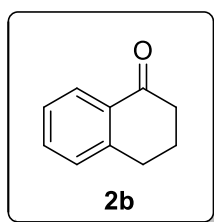

A mixture of Ni-MOF-74 (5 mg, 8 mol%), *tert*-butyl hydroperoxide 70% in water (108  $\mu$ L, 0.8 mmol), [bmim]Br (50  $\mu$ L, 0.18 mmol) and 1,2,3,4-tetrahydronaphthalene (26.4 mg, 0.2 mmol) were added into the tube, and stirred for 12 h at room temperature. After the reaction reached completion, the reaction mixture was extracted with ethyl acetate and then the solid catalyst was filtered. The filtrate mixture was evaporated under vacuum and purified by flash column chromatography (petroleum ether/ethyl acetate 50:1) to afford the desired product 3,4-dihydronaphthalen-1(2*H*)-one (**2b**), 75% isolated yield, colorless oil.  $^1\text{H}$  NMR  $\delta$  8.04 (dd,  $J=8.0, 4.0$  Hz, 1H), 7.47-7.45 (m, 1H), 7.33-7.24 (m, 2H), 2.97 (t,  $J=8$  Hz, 2H), 2.66 (t,  $J=8$  Hz, 2H), 2.18-2.11 (m, 2H). MS: 146.

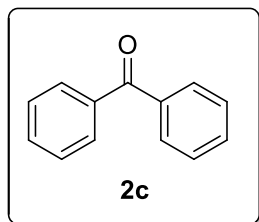

A mixture of Ni-MOF-74 (5 mg, 8 mol%), *tert*-butyl hydroperoxide 70% in water (108  $\mu$ L, 0.8 mmol), [bmim]Br (50  $\mu$ L, 0.18 mmol) and diphenylmethane (33.6 mg, 0.2 mmol) were added into the tube, and stirred for 12 h at room temperature. After the reaction reached completion, the reaction mixture was extracted with ethyl acetate and then the solid catalyst was filtered. The filtrate mixture was evaporated under vacuum and purified by flash column chromatography (petroleum ether/ethyl acetate 100:1) to afford the desired product benzophenone (**2c**), 95% isolated yield, colorless oil.  $^1\text{H}$  NMR  $\delta$  7.81-7.79 (m, 4H), 7.60-7.55 (m, 2H), 7.49-7.45 (m, 4H). MS: 182.



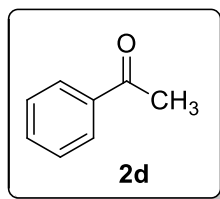

A mixture of Ni-MOF-74 (5 mg, 8 mol%), *tert*-butyl hydroperoxide 70% in water (108  $\mu$ L, 0.8 mmol), [bmim]Br (50  $\mu$ L, 0.18 mmol) and ethylbenzene (21.2 mg, 0.2 mmol) were added into the tube, and stirred for 12 h at room temperature. After the reaction reached completion, the reaction mixture was extracted with ethyl acetate and then the solid catalyst was filtered. The filtrate mixture was evaporated under vacuum and purified by flash column chromatography (hexane/ethyl acetate 100:1) to afford the desired product acetophenone (**2d**), 88% isolated yield, colorless oil. <sup>1</sup>H NMR (400 MHz, CDCl<sub>3</sub>)  $\delta$  7.97-7.95 (m, 2H), 7.58-7.51 (m, 1H), 7.48-7.44 (m, 2H), 2.61 (s, 3H). MS: 120.

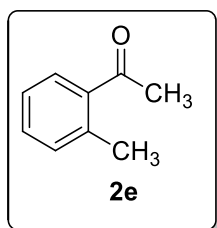

A mixture of Ni-MOF-74 (5 mg, 8 mol%), *tert*-butyl hydroperoxide 70% in water (108  $\mu$ L, 0.8 mmol), [bmim]Br (50  $\mu$ L, 0.18 mmol) and 1-ethyl-2-methylbenzene (24.0 mg, 0.2 mmol) were added into the tube, and stirred for 12 h at room temperature. After the reaction reached completion, the reaction mixture was extracted with ethyl acetate and then the solid catalyst was filtered. The filtrate mixture was evaporated under vacuum and purified by flash column chromatography (hexane/ethyl acetate 100:1) to afford the desired product 1-(*o*-tolyl)ethanone (**2e**), 85% isolated yield, colorless oil. <sup>1</sup>H NMR (400 MHz, CDCl<sub>3</sub>)  $\delta$  7.71 (dd, *J* = 8.0, 4.0 Hz, 1H), 7.43-7.37 (m, 1H), 7.29-7.27 (m, 1H), 7.25-7.24 (m, 1H), 2.99 (s, 3H), 2.54 (s, 3H). MS: 134.

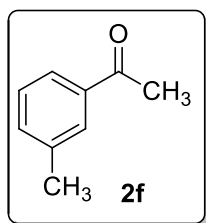

A mixture of Ni-MOF-74 (5 mg, 8 mol%), *tert*-butyl hydroperoxide 70% in water (108  $\mu$ L, 0.8 mmol), [bmim]Br (50  $\mu$ L, 0.18 mmol) and 1-ethyl-3-methylbenzene (24.0 mg, 0.2 mmol) were added into the tube, and stirred for 12 h at room temperature. After the reaction reached completion, the reaction mixture was extracted with ethyl acetate and then the solid catalyst was filtered. The filtrate mixture was evaporated under vacuum and purified by flash column chromatography (hexane/ethyl acetate 100:1) to afford the desired product 1-(*m*-tolyl)ethanone (**2f**), 86% isolated yield, colorless oil.  $^1\text{H}$  NMR (400 MHz,  $\text{CDCl}_3$ )  $\delta$  7.74-7.71 (m, 2H), 7.37-7.34 (m, 2H), 2.59 (s, 3H), 2.41 (s, 3H). MS: 134.

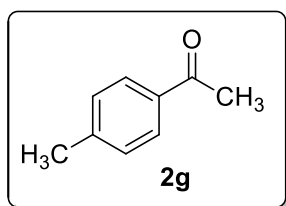

A mixture of Ni-MOF-74 (5 mg, 8 mol%), *tert*-butyl hydroperoxide 70% in water (108  $\mu$ L, 0.8 mmol), [bmim]Br (50  $\mu$ L, 0.18 mmol) and 1-ethyl-4-methylbenzene (24.0 mg, 0.2 mmol) were added into the tube, and stirred for 12 h at room temperature. After the reaction reached completion, the reaction mixture was extracted with ethyl acetate and then the solid catalyst was filtered. The filtrate mixture was evaporated under vacuum and purified by flash column chromatography (hexane/ethyl acetate 100:1) to afford the desired product 1-(*p*-tolyl)ethanone (**2g**), 92% isolated yield, colorless oil.  $^1\text{H}$  NMR (400 MHz,  $\text{CDCl}_3$ )  $\delta$  7.86 (d,  $J=8.0$  Hz, 2H), 7.27-7.25 (m, 2H), 2.58 (s, 3H), 2.41 (s, 3H). MS: 134.

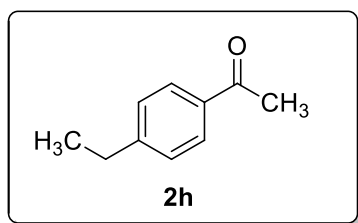

A mixture of Ni-MOF-74 (5 mg, 8 mol%), *tert*-butyl hydroperoxide 70% in water (108  $\mu$ L, 0.8 mmol), [bmim]Br (50  $\mu$ L, 0.18 mmol) and 1,4-diethylbenzene (26.8 mg, 0.2 mmol) were added into the tube, and stirred for 12 h at room temperature. After the reaction reached completion, the reaction mixture was extracted with ethyl acetate and then the solid catalyst was filtered. The filtrate mixture was evaporated under vacuum and purified by flash column chromatography (hexane/ethyl acetate 100:1) to afford the desired product 1-(4-ethylphenyl)ethanone (**2h**), 44% isolated yield, colorless oil.  $^1\text{H}$  NMR (400 MHz,  $\text{CDCl}_3$ )  $\delta$  7.89 (d,  $J = 8.0$  Hz, 2H), 7.29 (d,  $J = 8.0$  Hz, 2H), 2.71 (q,  $J = 8.0$  Hz, 2H), 2.58 (s, 3H), 1.26 (t,  $J = 8.0$  Hz, 3H). MS: 148.

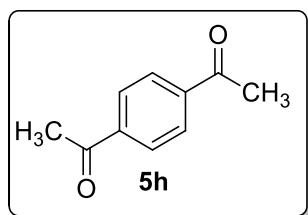

Byproduct 1,1'-(1,4-phenylene)diethanone (**5h**) was isolated by flash column chromatography (petroleum ether/ethyl acetate 20:1) with 22% isolated yield, white solid.  $^1\text{H}$  NMR (400 MHz,  $\text{CDCl}_3$ )  $\delta$  8.03 (s, 4H), 2.65 (s, 6H). MS: 162.

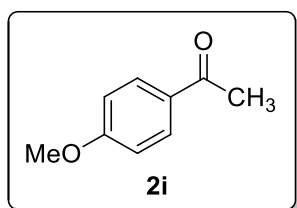

A mixture of Ni-MOF-74 (5 mg, 8 mol%), *tert*-butyl hydroperoxide 70% in water (108  $\mu$ L, 0.8 mmol), [bmim]Br (50  $\mu$ L, 0.18 mmol) and 1-ethyl-4-methoxybenzene (27.2 mg, 0.2 mmol) were added into the tube, and stirred for 12 h at room temperature. After the reaction reached completion, the reaction mixture was extracted with ethyl acetate and then the solid catalyst was filtered. The filtrate

mixture was evaporated under vacuum and purified by flash column chromatography (petroleum ether/ethyl acetate 50:1) to afford the desired product 1-(4-methoxyphenyl)ethanone (**2i**), 87% isolated yield, colorless oil.  $^1\text{H NMR}$  (400 MHz,  $\text{CDCl}_3$ )  $\delta$  7.95 (d,  $J = 8.0$  Hz, 2H), 6.94 (d,  $J = 8.0$  Hz, 2H), 3.88 (s, 3H), 2.56 (s, 3H). MS: 150.

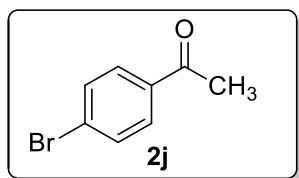

A mixture of Ni-MOF-74 (5 mg, 8 mol%), *tert*-butyl hydroperoxide 70% in water (108  $\mu\text{L}$ , 0.8 mmol), [bmim]Br (50  $\mu\text{L}$ , 0.18 mmol) and 1-bromo-4-ethylbenzene (37.0 mg, 0.2 mmol) were added into the tube, and stirred for 12 h at room temperature. After the reaction reached completion, the reaction mixture was extracted with ethyl acetate and then the solid catalyst was filtered. The filtrate mixture was evaporated under vacuum and purified by flash column chromatography (petroleum ether/ethyl acetate 100:1) to afford the desired product 1-(4-bromophenyl)ethanone (**2j**), 75% isolated yield, colorless oil.  $^1\text{H NMR}$  (400 MHz,  $\text{CDCl}_3$ )  $\delta$  7.82 (d,  $J = 8.0$  Hz, 2H), 7.61 (d,  $J = 8.0$  Hz, 2H), 2.59 (s, 3H). MS: 199.

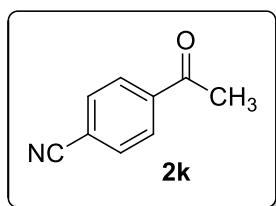

A mixture of Ni-MOF-74 (5 mg, 8 mol%), *tert*-butyl hydroperoxide 70% in water (108  $\mu\text{L}$ , 0.8 mmol), [bmim]Br (50  $\mu\text{L}$ , 0.18 mmol) and 4-ethylbenzonitrile (26.2 mg, 0.2 mmol) were added into the tube, and stirred for 12 h at 60  $^{\circ}\text{C}$ . After the reaction reached completion, the reaction mixture was extracted with ethyl acetate and then the solid catalyst was filtered. The filtrate mixture was evaporated under vacuum and

purified by flash column chromatography (petroleum ether/ethyl acetate 20:1) to afford the desired product 4-acetylbenzonitrile (**2k**), 70% isolated yield, white solid.  $^1\text{H}$  NMR (400 MHz,  $\text{CDCl}_3$ )  $\delta$  8.05 (d,  $J = 8.0$  Hz, 2H), 7.78 (d,  $J = 8.0$  Hz, 2H), 2.65 (s, 3H). MS: 145.

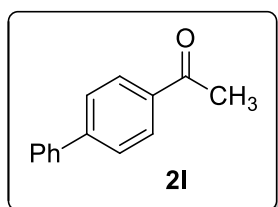

A mixture of Ni-MOF-74 (5 mg, 8 mol%), *tert*-butyl hydroperoxide 70% in water (108  $\mu\text{L}$ , 0.8 mmol), [bmim]Br (50  $\mu\text{L}$ , 0.18 mmol) and 4-ethyl-1,1'-biphenyl (36.4 mg, 0.2 mmol) were added into the tube, and stirred for 12 h at room temperature. After the reaction reached completion, the reaction mixture was extracted with ethyl acetate and then the solid catalyst was filtered. The filtrate mixture was evaporated under vacuum and purified by flash column chromatography (petroleum ether/ethyl acetate 50:1) to afford the desired product 1-([1,1'-biphenyl]-4-yl)ethanone (**2l**), 80% isolated yield, white solid.  $^1\text{H}$  NMR (400 MHz,  $\text{CDCl}_3$ )  $\delta$  8.05-8.02 (m, 2H), 7.71-7.68 (m, 2H), 7.65-7.62 (m, 2H), 7.50-7.46 (m, 2H), 7.43-7.40 (m, 1H), 2.64 (s, 3H). MS: 196.

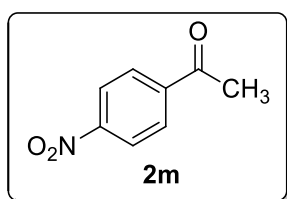

A mixture of Ni-MOF-74 (5 mg, 8 mol%), *tert*-butyl hydroperoxide 70% in water (108  $\mu\text{L}$ , 0.8 mmol), [bmim]Br (50  $\mu\text{L}$ , 0.18 mmol) and 1-ethyl-4-nitrobenzene (30.2 mg, 0.2 mmol) were added into the tube, and stirred for 12 h at room temperature. After the reaction reached completion, the reaction mixture was extracted with ethyl acetate and then the solid catalyst was filtered. The filtrate mixture was evaporated under vacuum and purified by flash column chromatography (petroleum ether/ethyl

acetate 20:1) to afford the desired product 1-(4-nitrophenyl)ethanone (**2m**), 62% isolated yield, white solid.  $^1\text{H NMR}$  (400 MHz,  $\text{CDCl}_3$ )  $\delta$  8.32 (d,  $J = 8.0$  Hz, 2H), 8.11 (d,  $J = 8.0$  Hz, 2H), 2.68 (s, 2H). MS: 165.

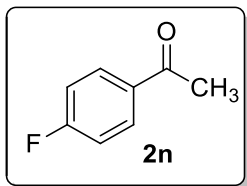

A mixture of Ni-MOF-74 (5 mg, 8 mol%), *tert*-butyl hydroperoxide 70% in water (108  $\mu\text{L}$ , 0.8 mmol), [bmim]Br (50  $\mu\text{L}$ , 0.18 mmol) and 1-ethyl-4-fluorobenzene (24.8 mg, 0.2 mmol) were added into the tube, and stirred for 12 h at room temperature. Isolated yield was difficult to obtain due to the low boiling point of the product 1-(4-fluorophenyl)ethanone (77-78  $^{\circ}\text{C}$ ). After the reaction reached completion, the reaction mixture was extracted with ethyl acetate and then the solid catalyst was filtered. The filtrate mixture was analyzed using a GC-FID to get the GC yield. The product identity was further confirmed by GC-MS. 1-(4-fluorophenyl)ethanone (**2n**), 60% GC yield. MS: 138.

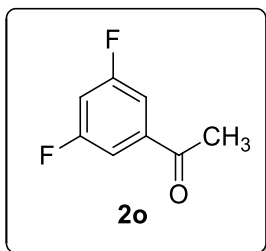

A mixture of Ni-MOF-74 (5 mg, 8 mol%), *tert*-butyl hydroperoxide 70% in water (108  $\mu\text{L}$ , 0.8 mmol), [bmim]Br (50  $\mu\text{L}$ , 0.18 mmol) and 1-ethyl-3,5-difluorobenzene (24.8 mg, 0.2 mmol) were added into the tube, and stirred for 12 h at room temperature. After the reaction reached completion, the reaction mixture was extracted with ethyl acetate and then the solid catalyst was filtered. The filtrate mixture was evaporated under vacuum and purified by flash column chromatography (hexane/ethyl acetate 100:1) to afford the desired product 1-(3,5-difluorophenyl)ethanone (**2o**), colorless oil. The purification of the product is

difficult due to its low boiling point (94 °C), 90% yield (determined by GC), <sup>1</sup>H NMR (400 MHz, CDCl<sub>3</sub>) δ 7.51-45 (m, 2H), 7.03-7.02 (m, 1H), 2.59 (s, 3H). MS: 156.

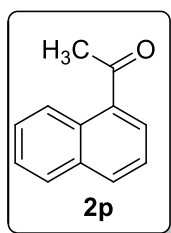

A mixture of Ni-MOF-74 (5 mg, 8 mol%), *tert*-butyl hydroperoxide 70% in water (108 μL, 0.8 mmol), [bmim]Br (50 μL, 0.18 mmol) and 1-ethylnaphthalene (31.2 mg, 0.2 mmol) were added into the tube, and stirred for 12 h at room temperature. After the reaction reached completion, the reaction mixture was extracted with ethyl acetate and then the solid catalyst was filtered. The filtrate mixture was evaporated under vacuum and purified by flash column chromatography (petroleum ether/ethyl acetate 100:1) to afford the desired product 1-(naphthalen-1-yl)ethanone (**2p**), 80% isolated yield, white solid. <sup>1</sup>H NMR (400 MHz, CDCl<sub>3</sub>) δ 8.75 (dd, *J* = 8.0, 0.8 Hz, 1H), 8.00 (d, *J* = 8.0 Hz, 1H), 7.95 (dd, *J* = 8.0, 1.2 Hz, 1H), 7.89-7.87 (m, 1H), 7.63-7.59 (m, 1H), 7.56-7.49 (m, 2H), 2.76 (s, 3H). MS: 170.

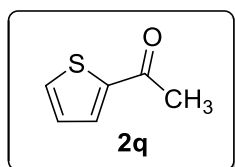

A mixture of Ni-MOF-74 (5 mg, 8 mol%), *tert*-butyl hydroperoxide 70% in water (108 μL, 0.8 mmol), [bmim]Br (50 μL, 0.18 mmol) and 2-ethylthiophene (22.4 mg, 0.2 mmol) were added into the tube, and stirred for 12 h at room temperature. After the reaction reached completion, the reaction mixture was extracted with ethyl acetate and then the solid catalyst was filtered. The filtrate mixture was evaporated under vacuum and purified by flash column chromatography (hexane/ethyl acetate 100:1) to afford the desired product 1-(thiophen-2-yl)ethanone (**2q**), 95% isolated yield, colorless oil. <sup>1</sup>H NMR (400 MHz, CDCl<sub>3</sub>) δ 7.70 (dd, *J* = 3.8, 1.1 Hz, 1H), 7.64 (dd, *J* = 5.0, 1.1 Hz, 1H), 7.13 (dd, *J* = 4.9, 3.8 Hz, 1H), 2.57 (s, 3H). MS: 126.

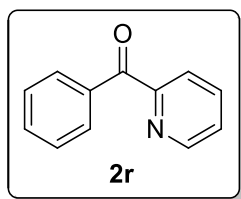

A mixture of Ni-MOF-74 (5 mg, 8 mol%), *tert*-butyl hydroperoxide 70% in water (108  $\mu$ L, 0.8 mmol), [bmim]Br (50  $\mu$ L, 0.18 mmol) and 2-benzylpyridine (33.8 mg, 0.2 mmol) were added into the tube, and stirred at 60  $^{\circ}$ C for 12 h. After the reaction reached completion, the reaction mixture was extracted with ethyl acetate and then the solid catalyst was filtered. The filtrate mixture was evaporated under vacuum and purified by flash column chromatography (petroleum ether/ethyl acetate 20:1) to afford the desired product phenyl(pyridin-2-yl)methanone (**2r**), 74% isolated yield, white solid.  $^1\text{H}$  NMR (400 MHz,  $\text{CDCl}_3$ )  $\delta$  8.72 (d,  $J = 4.0$  Hz, 1H), 8.08-8.02 (m, 3H), 7.89 (td,  $J = 8.0, 2.0$  Hz, 1H), 7.61-7.56 (m, 1H), 7.50-7.46 (m, 3H). MS: 183.

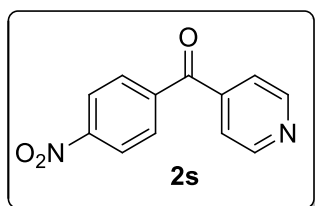

A mixture of Ni-MOF-74 (5 mg, 8 mol%), *tert*-butyl hydroperoxide 70% in water (108  $\mu$ L, 0.8 mmol), [bmim]Br (50  $\mu$ L, 0.18 mmol) and 4-(4-nitrobenzyl)pyridine (42.8 mg, 0.2 mmol) were added into the tube, and stirred at 60  $^{\circ}$ C for 12 h. After the reaction reached completion, the reaction mixture was extracted with ethyl acetate and then the solid catalyst was filtered. The filtrate mixture was evaporated under vacuum and purified by flash column chromatography (petroleum ether/ethyl acetate 2:1) to afford the desired product (4-nitrophenyl)(pyridin-4-yl)methanone (**2s**), 83% isolated yield, white solid.  $^1\text{H}$  NMR (400 MHz,  $\text{CDCl}_3$ )  $\delta$  8.85 (d,  $J = 5.0$  Hz, 2H), 8.36-8.32 (m, 2H), 7.97-7.94 (m, 2H), 7.58 (dd,  $J = 4.0, 1.5$  Hz, 2H). MS: 228.

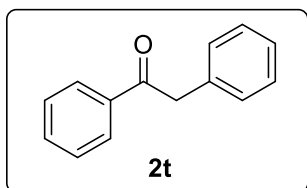



A mixture of Ni-MOF-74 (5 mg, 8 mol%), *tert*-butyl hydroperoxide 70% in water (108  $\mu$ L, 0.8 mmol), [bmim]Br (50  $\mu$ L, 0.18 mmol) and 1,2-diphenylethane (36.4 mg, 0.2 mmol) were added into the tube, and stirred for 12 h at room temperature. After the reaction reached completion, the reaction mixture was extracted with ethyl acetate and then the solid catalyst was filtered. The filtrate mixture was evaporated under vacuum and purified by flash column chromatography (petroleum ether/ethyl acetate 50:1) to afford the desired product 1,2-diphenylethan-1-one (**2t**), 90% isolated yield, white solid.  $^1\text{H}$  NMR (400 MHz,  $\text{CDCl}_3$ )  $\delta$  8.03-7.97 (m, 3H), 7.56-7.52 (m, 2H), 7.48-7.46 (m, 2H), 7.33-7.28 (m, 3H), 4.29 (s, 2H). MS: 196.

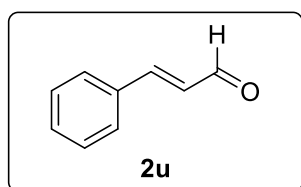

A mixture of Ni-MOF-74 (5 mg, 8 mol%), *tert*-butyl hydroperoxide 70% in water (108  $\mu$ L, 0.8 mmol), [bmim]Br (50  $\mu$ L, 0.18 mmol) and allylbenzene (23.6 mg, 0.2 mmol) were added into the tube, and stirred for 12 h at room temperature. After the reaction reached completion, the reaction mixture was extracted with ethyl acetate and then the solid catalyst was filtered. The filtrate mixture was evaporated under vacuum and purified by flash column chromatography (petroleum ether/ethyl acetate 50:1) to afford the desired product cinnamaldehyde (**2u**), 60% isolated yield, colorless oil.  $^1\text{H}$  NMR (400 MHz,  $\text{CDCl}_3$ )  $\delta$  9.72 (d,  $J = 8.0$ , 1H), 7.59-7.57 (m, 2H), 9.49 (d,  $J = 16.0$ , 1H), 7.45-7.44 (m, 3H), 6.73 (q,  $J = 8.0$ , 1H). MS: 132.

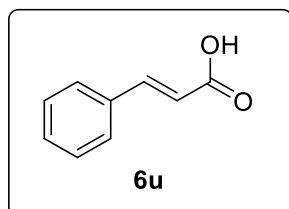

Byproduct 1,1'-(1,4-phenylene)diethanone (**6u**) was isolated by flash column chromatography (petroleum ether/ethyl acetate 1:1) with 23% isolated yield, white solid.  $^1\text{H}$  NMR (400 MHz,  $\text{DMSO}-d_6$ )  $\delta$  12.47 (s, 1H), 7.96-7.93 (m, 1H), 7.69-7.67

(m, 1H), 7.59 (d,  $J = 16.0$ , 1H), 7.52-7.46 (m, 1H), 7.43-7.41 (m, 2H), 6.52 (d,  $J = 16.0$ , 1H). MS: 148.

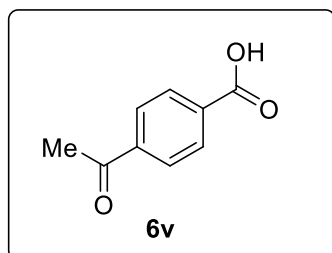

A mixture of Ni-MOF-74 (5 mg, 8 mol%), *tert*-butyl hydroperoxide 70% in water (108  $\mu$ L, 0.8 mmol), [bmim]Br (50  $\mu$ L, 0.18 mmol) and 4-ethylbenzaldehyde (26.8 mg, 0.2 mmol) were added into the tube, and stirred for 12 h at room temperature. After the reaction reached completion, the reaction mixture was extracted with ethyl acetate and then the solid catalyst was filtered. The filtrate mixture was evaporated under vacuum and purified by flash column chromatography (ethyl acetate) to afford the desired product 4-acetylbenzoic acid (**2u**), 58% isolated yield, white solid.  $^1\text{H}$  NMR (400 MHz, DMSO- $d_6$ )  $\delta$  13.30 (s, 1H), 8.04 (s, 4H), 2.61 (s, 3H). MS: 164.

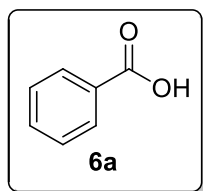

A mixture of Ni-MOF-74 (5 mg, 8 mol%), *tert*-butyl hydroperoxide 70% in water (108  $\mu$ L, 0.8 mmol), [bmim]Br (50  $\mu$ L, 0.18 mmol) and toluene (18.4 mg, 0.2 mmol) were added into the tube, and stirred at 60  $^{\circ}\text{C}$  for 12 h. After the reaction reached completion, the reaction mixture was extracted with ethyl acetate and then the solid catalyst was filtered. The filtrate mixture was evaporated under vacuum and purified by flash column chromatography (ethyl acetate) to afford the desired product benzoic acid (**6a**). 76% isolated yield, white solid.  $^1\text{H}$  NMR (400 MHz, DMSO- $d_6$ )  $\delta$  12.95 (s, 1H), 7.97-7.94 (m, 2H), 7.64-7.59 (m, 1H), 7.52-7.47 (m, 2H). MS: 122.

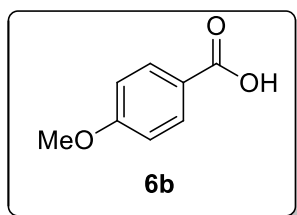

A mixture of Ni-MOF-74 (5 mg, 8 mol%), *tert*-butyl hydroperoxide 70% in water (108  $\mu$ L, 0.8 mmol), [bmim]Br (50  $\mu$ L, 0.18 mmol) and 1-methoxy-4-methylbenzene (24.4 mg, 0.2 mmol) were added into the tube, and stirred at 60  $^{\circ}$ C for 12 h. After the reaction reached completion, the reaction mixture was extracted with ethyl acetate and then the solid catalyst was filtered. The filtrate mixture was evaporated under vacuum and purified by flash column chromatography (ethyl acetate) to afford the desired product 4-methoxybenzoic acid (**6b**). 56% isolated yield, white solid.  $^1$ H NMR (400 MHz, DMSO- $d_6$ )  $\delta$  12.61 (s, 1H), 7.90-7.88 (m, 2H), 7.03-7.00 (m, 2H), 3.82 (s, 3H). MS: 152.

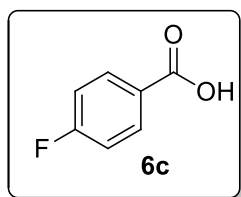

A mixture of Ni-MOF-74 (5 mg, 8 mol%), *tert*-butyl hydroperoxide 70% in water (108  $\mu$ L, 0.8 mmol), [bmim]Br (50  $\mu$ L, 0.18 mmol) and 1-fluoro-4-methylbenzene (22.0 mg, 0.2 mmol) were added into the tube, and stirred at 60  $^{\circ}$ C for 12 h. After the reaction reached completion, the reaction mixture was extracted with ethyl acetate and then the solid catalyst was filtered. The filtrate mixture was evaporated under vacuum and purified by flash column chromatography (ethyl acetate) to afford the desired product 4-fluorobenzoic acid (**6c**). 60% isolated yield, white solid.  $^1$ H NMR (400 MHz, DMSO- $d_6$ )  $\delta$  13.03 (s, 1H), 8.00 (dd,  $J$  = 8.0, 5.7 Hz, 2H), 7.30 (t,  $J$  = 8.0 Hz, 2H). MS: 140.

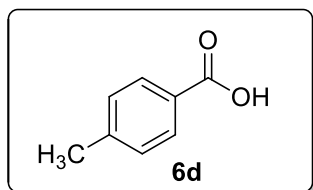

A mixture of Ni-MOF-74 (5 mg, 8 mol%), *tert*-butyl hydroperoxide 70% in water (108  $\mu$ L, 0.8 mmol), [bmim]Br (50  $\mu$ L, 0.18 mmol) and *p*-xylene (21.2 mg, 0.2 mmol) were added into the tube, and stirred at 60  $^{\circ}$ C for 12 h. After the reaction reached completion, the reaction mixture was extracted with ethyl acetate and then the solid catalyst was filtered. The filtrate mixture was evaporated under vacuum and purified by flash column chromatography (ethyl acetate) to afford the desired product 4-methylbenzoic acid (**6d**). 62% isolated yield, white solid.  $^1$ H NMR (400 MHz, DMSO)  $\delta$  12.75 (s, 1H), 7.83 (d,  $J$  = 8.0 Hz, 2H), 7.30 (d,  $J$  = 8.0 Hz, 2H), 2.37 (s, 3H). MS: 136.

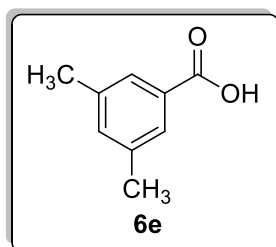

A mixture of Ni-MOF-74 (5 mg, 8 mol%), *tert*-butyl hydroperoxide 70% in water (108  $\mu$ L, 0.8 mmol), [bmim]Br (50  $\mu$ L, 0.18 mmol) and mesitylene (24.0 mg, 0.2 mmol) were added into the tube, and stirred at 60  $^{\circ}$ C for 12 h. After the reaction reached completion, the reaction mixture was extracted with ethyl acetate and then the solid catalyst was filtered. The filtrate mixture was evaporated under vacuum and purified by flash column chromatography (ethyl acetate) to afford the desired product 3,5-dimethylbenzoic acid (**6e**). 70% isolated yield, white solid.  $^1$ H NMR (400 MHz, DMSO)  $\delta$  12.73 (s, 1H), 7.56 (dd,  $J$  = 1.0, 0.6 Hz, 2H), 7.24 (t,  $J$  = 0.6 Hz, 1H), 2.32 (s, 6H). MS: 150.

#### 4.4 Gram Scale Experiments

Gram Scale for Synthesis of Benzophenone

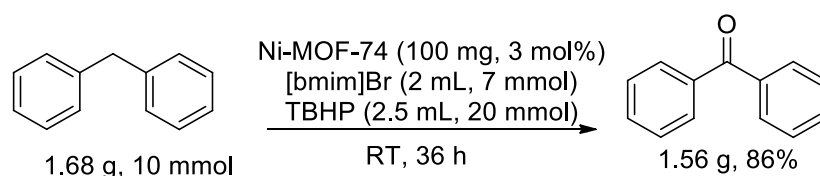

A mixture of Ni-MOF-74 (100 mg, 3 mol%), *tert*-butyl hydroperoxide 70% in water

(2.5 mL, 20 mmol), [bmim]Br (2 mL, 7 mmol) and diphenylmethane (1.68 g, 10 mmol) were added into a 25 mL flask, and stirred for 36 h at room temperature. After the reaction reached completion, 10 mL water was added to reaction mixture, extracted with ethyl acetate (10 mL×3) and then the solid catalyst was filtered. The filtrate mixture was evaporated under vacuum and purified by flash column chromatography (petroleum ether/ethyl acetate 100:1) to afford the desired product benzophenone (**2c**), 86% isolated yield, colorless oil.

#### 4.5 Recycling Experiment

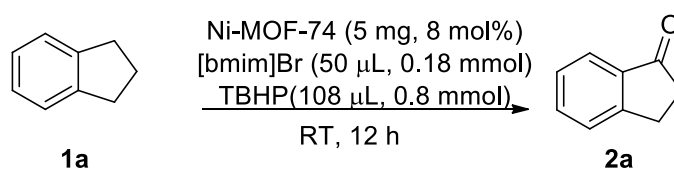

A mixture of Ni-MOF-74 (5 mg, 8 mol%), *tert*-butyl hydroperoxide 70% in water (108 μL, 0.8 mmol), [bmim]Br (50 μL, 0.18 mmol) and 2,3-dihydro-1H-indene (23.6 mg, 0.2 mmol) were added into the tube, and stirred for 12 h at room temperature. After the reaction reached completion, the mixture was extracted three times by ethyl acetate (5 mL×3), and then the remaining viscous aqueous mixture was concentrated and dried in vacuo. The catalyst system was recovered for use in the next run under the same conditions. The combined organic layer was evaporated under vacuum and purified by flash column chromatography (petroleum ether/ethyl acetate 100:1) to afford the desired product **2a** (Table S1).

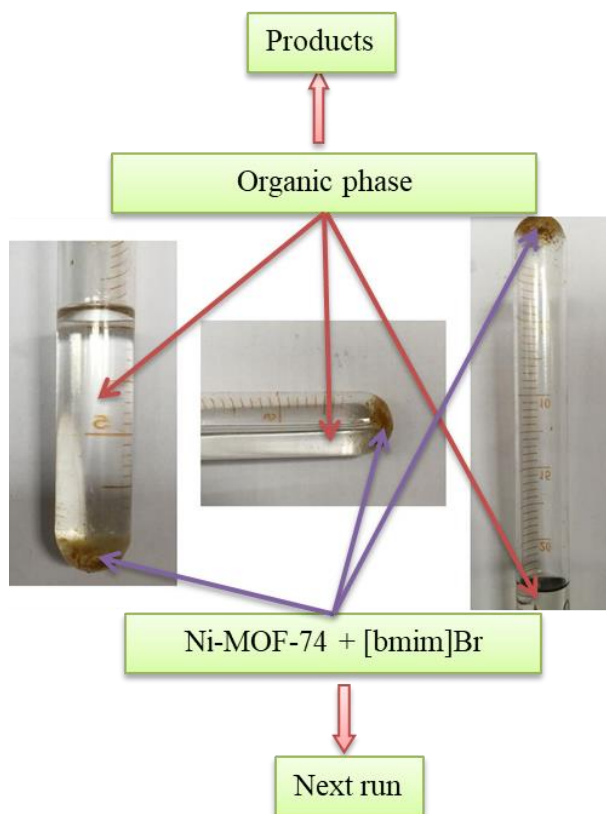

Fig. S2 The reaction mixture after addition ethyl acetate.

Table S3. Recycling Experiments.

| Run            | 1  | 2  | 3  | 4  |
|----------------|----|----|----|----|
| Yield (%)      | 87 | 78 | 73 | 72 |
| Conversion (%) | 96 | 88 | 84 | 84 |

## 4.6 Control Experiments on the Reaction Mechanism

### 4.6.1 The Influence of O<sub>2</sub> on the Reaction

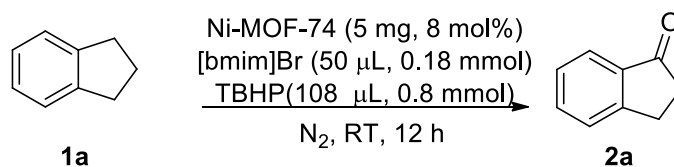

To a Schlenk tube were added Ni-MOF-74 (5 mg, 8 mol%), *tert*-butyl hydroperoxide 70% in water (108 μL, 0.8 mmol), [bmim]Br (50 μL, 0.18 mmol) and diphenylmethane (33.6 mg, 0.2 mmol). The reaction tube was flushed with N<sub>2</sub> for 1.5 minutes and then equipped with a N<sub>2</sub> balloon. The system was stirred for 24 h at room temperature. After the reaction reached completion, the reaction mixture was extracted with ethyl acetate and then the solid catalyst was filtered. The filtrate mixture was analyzed using a GC-FID to get the GC yield (92%). The product identity was further confirmed by GC-MS.

#### 4.6.2 The Influence of H<sub>2</sub>O on the Reaction

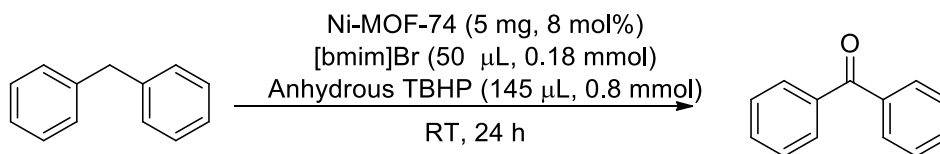

A mixture of Ni-MOF-74 (5 mg, 8 mol%), 5.5 M tert-butyl hydroperoxide in decane (145  $\mu$ L, 0.8 mmol), [bmim]Br (50  $\mu$ L, 0.18 mmol) and diphenylmethane (33.6 mg, 0.2 mmol) were added into the tube, and stirred for 24 h at room temperature. After the reaction reached completion, the reaction mixture was extracted with ethyl acetate and then the solid catalyst was filtered. The filtrate mixture was analyzed using a GC-FID to get the GC yield (88%). The product identity was further confirmed by GC-MS.



### 4.6.3 Radical Trapping Experiments

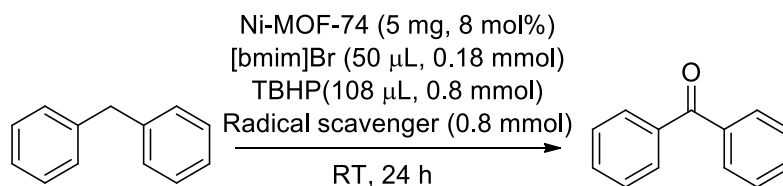

A mixture of Ni-MOF-74 (5 mg, 8 mol%), *tert*-butyl hydroperoxide 70% in water (108  $\mu$ L, 0.8 mmol), [bmim]Br (50  $\mu$ L, 0.18 mmol), radical scavenger (0.8 mmol) and diphenylmethane (33.6 mg, 0.2 mmol) were added into the tube, and stirred for 24 h at room temperature. After the reaction reached completion, the reaction mixture was extracted with ethyl acetate and then the solid catalyst was filtered. The filtrate mixture was analyzed using a GC-FID to get the GC yield.

Table S4. Radical Trapping experiments

| Entry | Radical scavenger                             | Yield |
|-------|-----------------------------------------------|-------|
| 1     | 2,2,6,6-tetramethyl-1-piperidinyloxy (TEMPO)  | Trace |
| 2     | BHT(2,6-di- <i>tert</i> butyl-4-methylphenol) | Trace |
| 3     | DPE (1,1-diphenylethylene)                    | 36    |

#### 4.6.4 The Influence of Oxidants on the Reaction

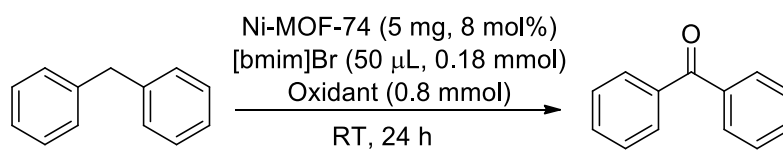

A mixture of Ni-MOF-74 (5 mg, 8 mol%), oxidant (0.8 mmol), [bmim]Br (50  $\mu$ L, 0.18 mmol) and diphenylmethane (33.6 mg, 0.2 mmol) were added into the tube, and stirred for 24 h at room temperature. After the reaction reached completion, the reaction mixture was extracted with ethyl acetate and then the solid catalyst was filtered. The filtrate mixture was analyzed using a GC-FID to get the GC yield.

Table S5. The Influence of Oxidants on the Reaction.

| Entry | Oxidant                     | Atmosphere | IL       | Additive | Yield |
|-------|-----------------------------|------------|----------|----------|-------|
| 1     | <i>t</i> -BuOO <i>t</i> -Bu | air        | [bmim]Br | -        | Trace |
| 2     | CumOOCum                    | air        | [bmim]Br | -        | Trace |
| 3     | BPO                         | air        | [bmim]Br | -        | Trace |
| 4     | CumOOH                      | air        | [bmim]Br | -        | 49    |
| 5     | TBHP                        | air        | -        | KBr      | 47    |

#### 4.6.5 Phenyl(*p*-tolyl)methanol Oxidation Experiment

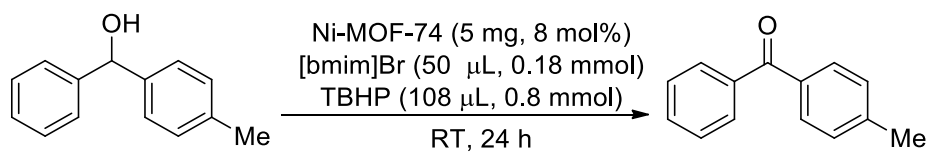

A mixture of Ni-MOF-74 (5 mg, 8 mol%), *tert*-butyl hydroperoxide 70% in water (108  $\mu$ L, 0.8 mmol), [bmim]Br (50  $\mu$ L, 0.18 mmol), and phenyl(*p*-tolyl)methanol (39.8 mg, 0.2 mmol) were added into the tube, and stirred for 24 h at room temperature. After the reaction reached completion, the reaction mixture was extracted with ethyl acetate and then the solid catalyst was filtered. The filtrate mixture was analyzed using a GC-FID to get the GC yield (98%), 95% isolated yield was afforded after purified by flash column chromatography (petroleum ether/ethyl acetate 100:1).

#### 4.6.6 (Bromomethylene)dibenzene Oxidation Experiment

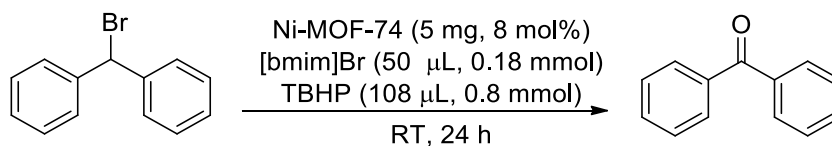

A mixture of Ni-MOF-74 (5 mg, 8 mol%), *tert*-butyl hydroperoxide 70% in water (108 μL, 0.8 mmol), [bmim]Br (50 μL, 0.18 mmol), and (bromomethylene)dibenzene (49.4 mg, 0.2 mmol) were added into the tube, and stirred for 24 h at room temperature. After the reaction reached completion, the reaction mixture was extracted with ethyl acetate and then the solid catalyst was filtered. The filtrate mixture was analyzed using a GC-FID, and no product was detected by TLC or GC-MS analysis.

#### 4.6.7 Competition Experiments

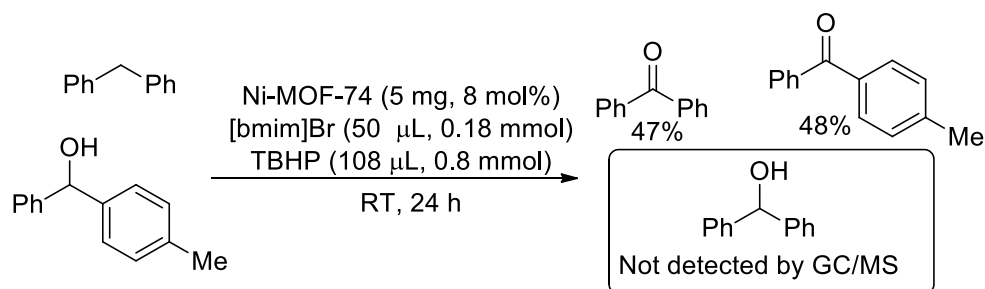

A mixture of Ni-MOF-74 (5 mg, 8 mol%), *tert*-butyl hydroperoxide 70% in water (108 μL, 0.8 mmol), [bmim]Br (50 μL, 0.18 mmol), phenyl(*p*-tolyl)methanol (19.8 mg, 0.1 mmol) and diphenylmethane (16.8 mg, 0.1 mmol) were added into the tube, and stirred for 24 h at room temperature. After the reaction reached completion, the reaction mixture was extracted with ethyl acetate and then the solid catalyst was filtered. The filtrate mixture was analyzed using a GC-MS, no diphenylmethanol intermediate was detected throughout the reaction process.

## 5. Spectra of SEM, PXRD, TGA and FT-IR of Ni-MOF-74

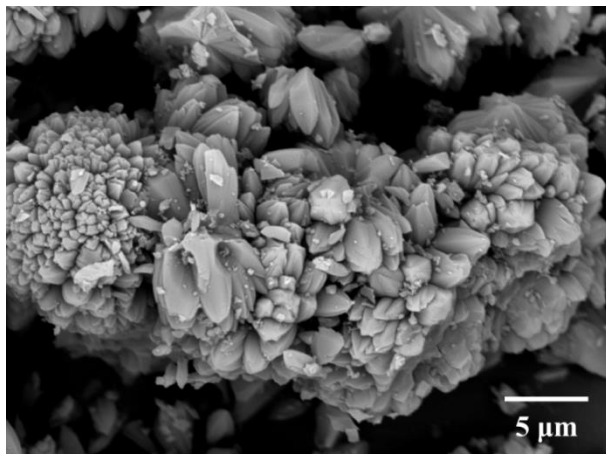

Fig. S3 SEM images of Ni-MOF-74.

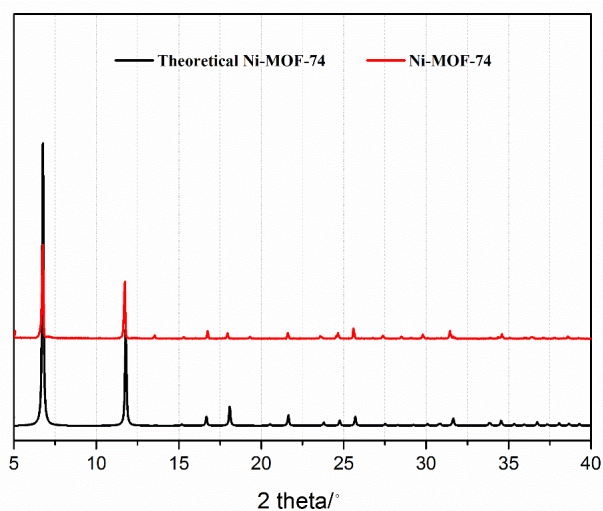

Fig. S4 PXRD images of theoretical simulation and synthesis of Ni-MOF-74.

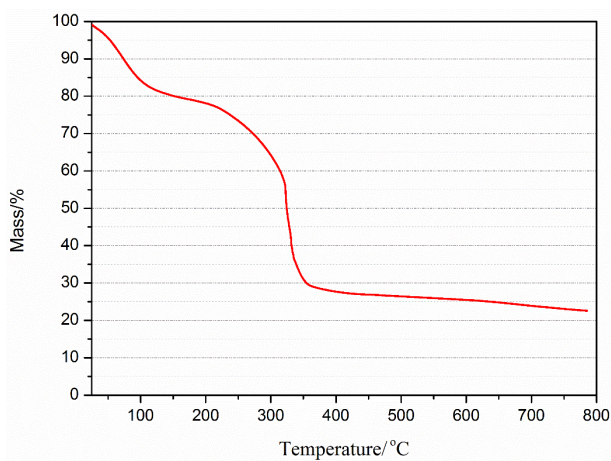

Fig. S5 The TGA images of Ni-MOF-74.

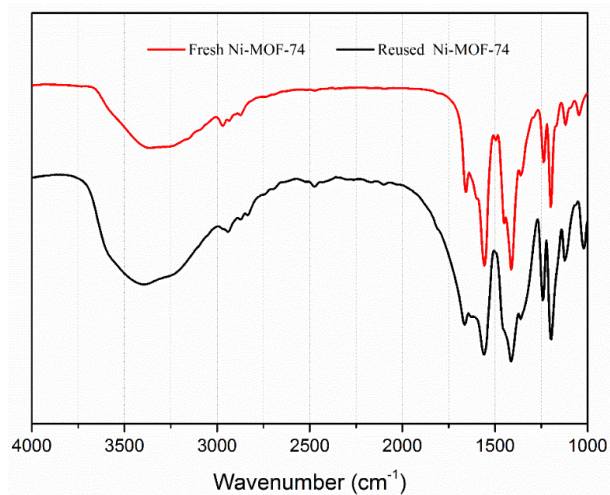

Fig. S6 FT-IR spectra of the fresh and reused Ni-MOF-74.

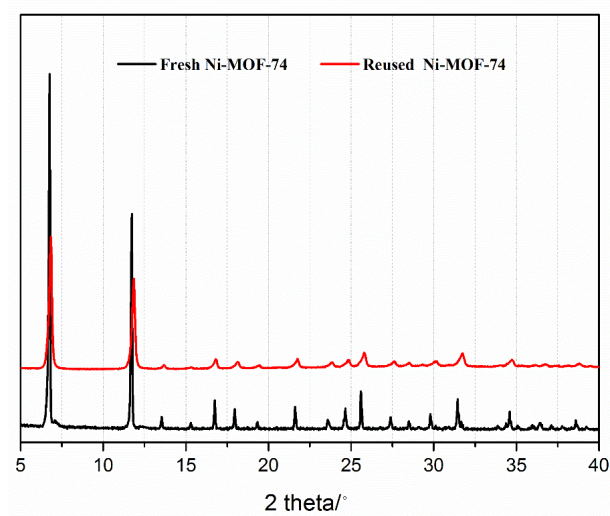

Fig. S7 PXRD of the fresh and reused Ni-MOF-74.

## 6. Copies of $^1\text{H}$ NMR and MS

$^1\text{H}$  NMR spectra of compound **2a**

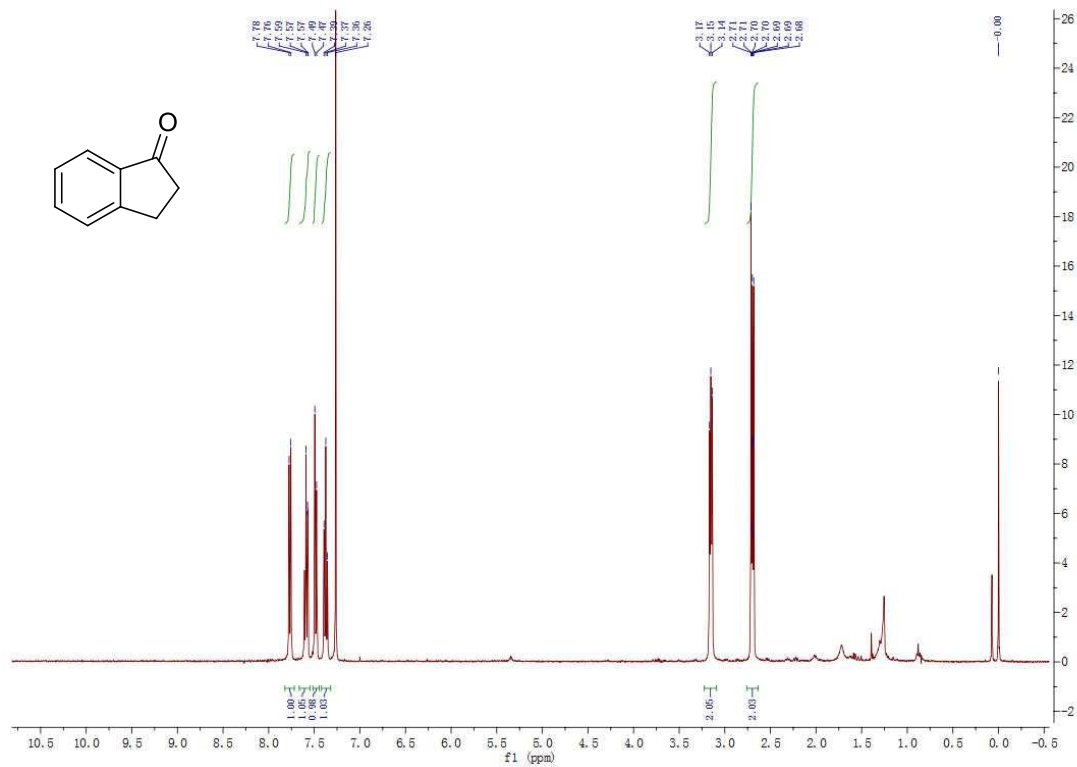

$^1\text{H}$  NMR spectra of compound **2b**

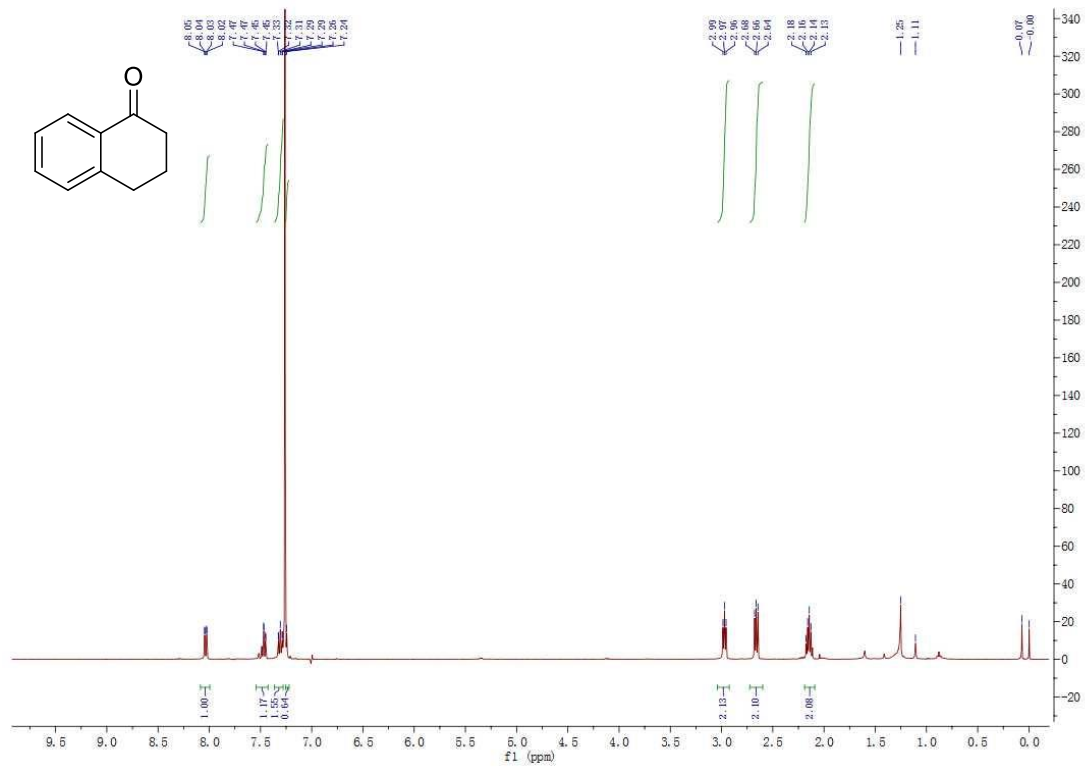



### <sup>1</sup>H NMR spectra of compound 2c

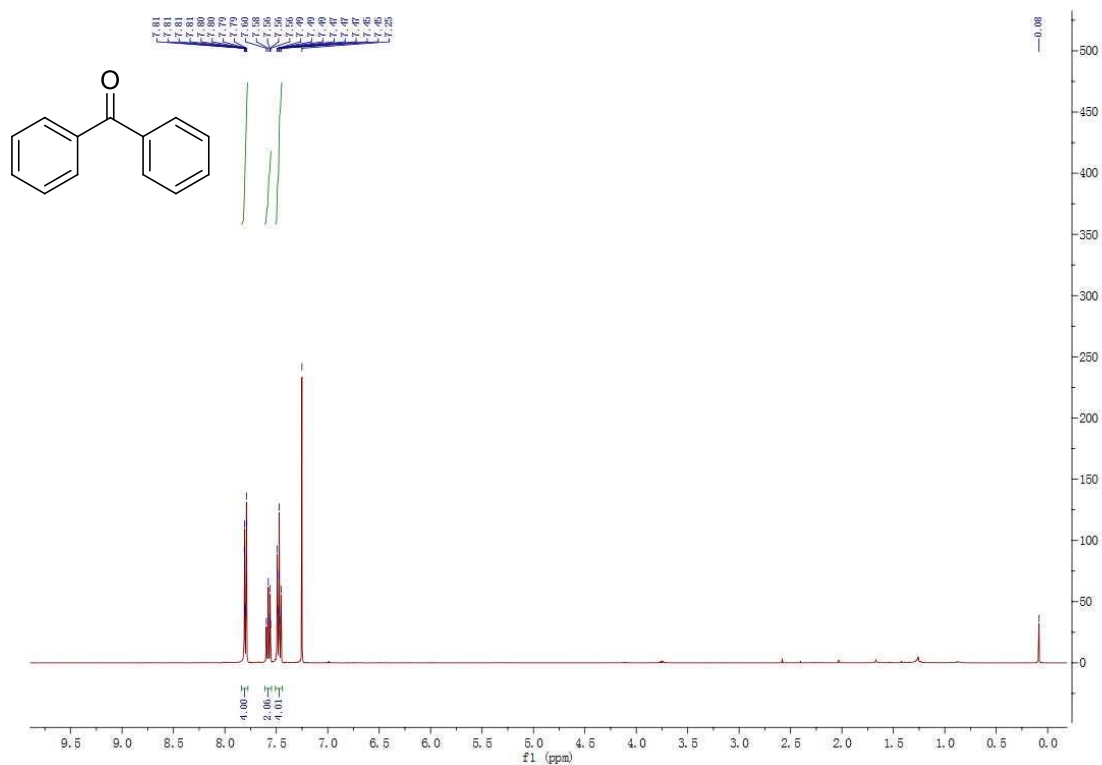

### <sup>1</sup>H NMR spectra of compound 2d

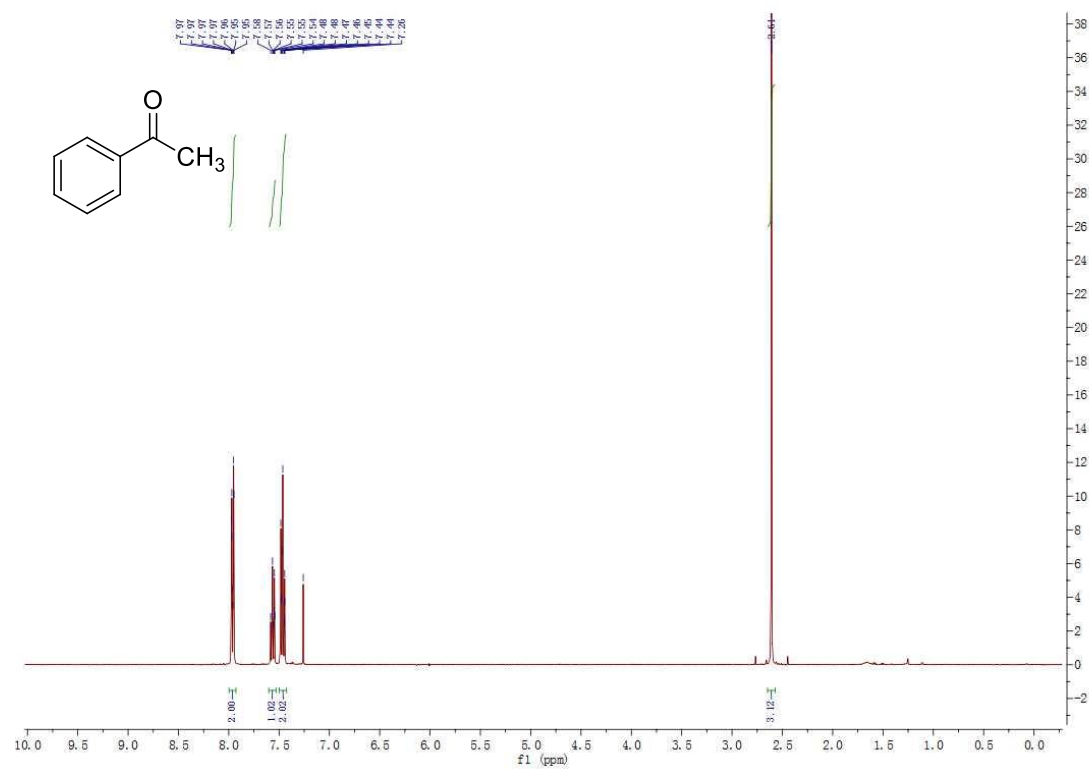



### <sup>1</sup>H NMR spectra of compound **2g**

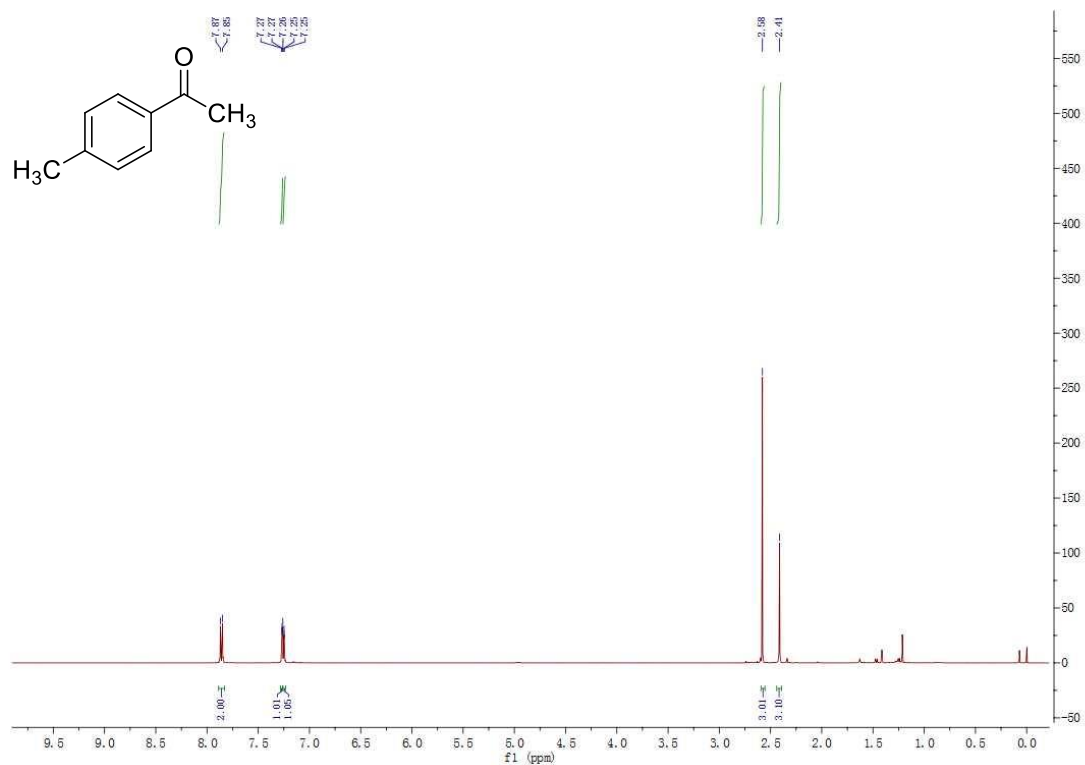

### <sup>1</sup>H NMR spectra of compound **2h**

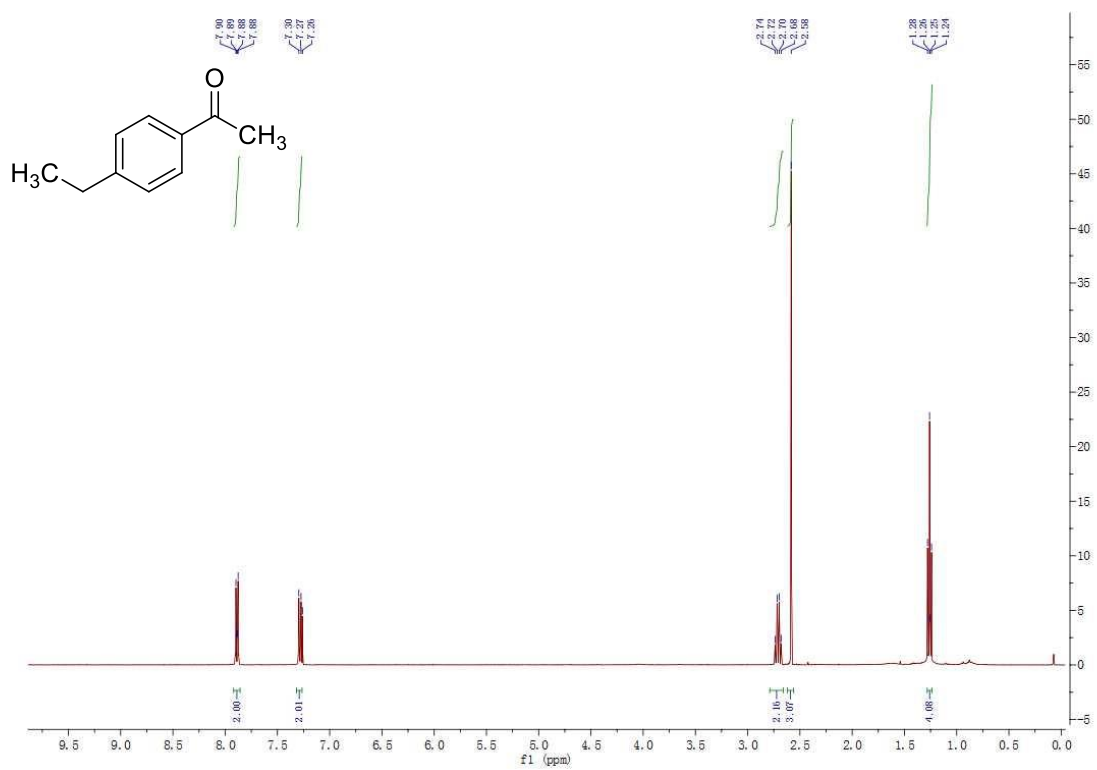

<sup>1</sup>H NMR spectra of compound **5h**

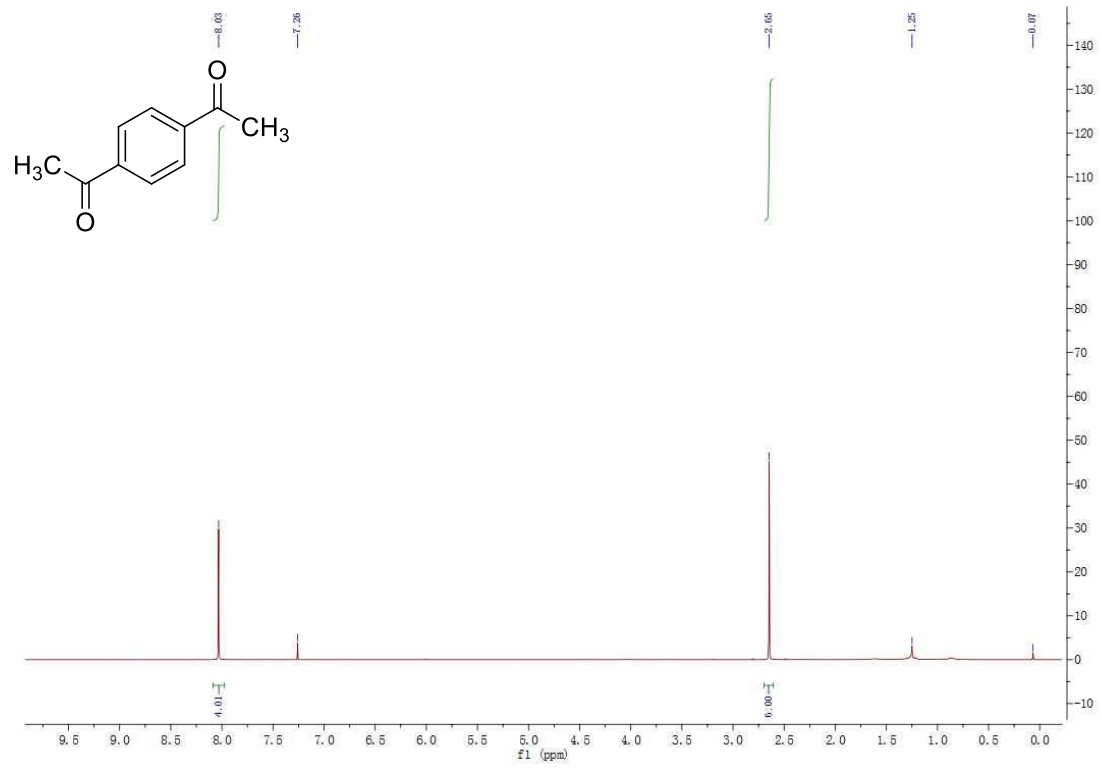

<sup>1</sup>H NMR spectra of compound **2i**

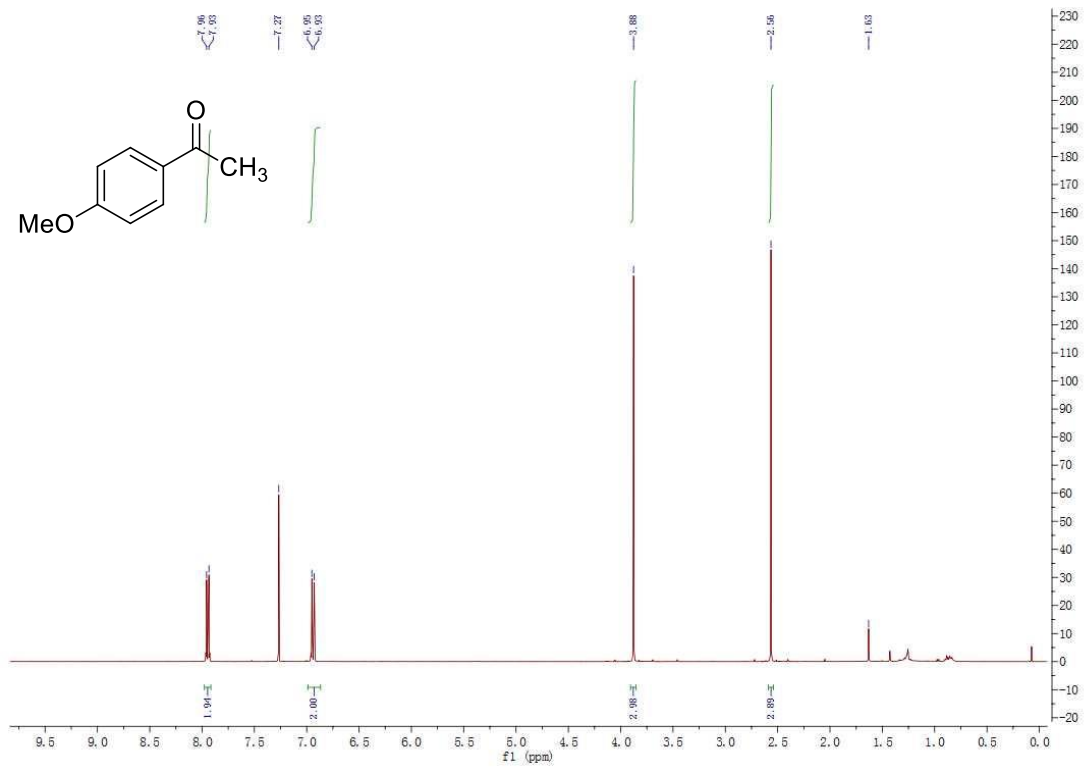

### <sup>1</sup>H NMR spectra of compound **2j**

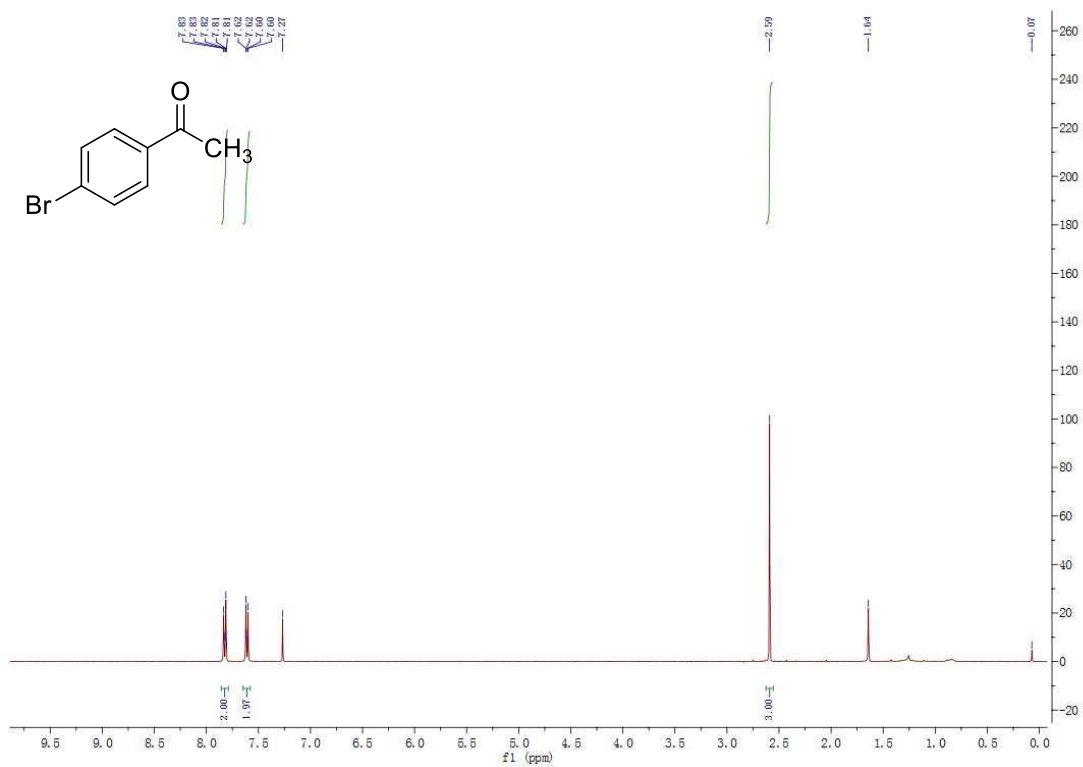

### <sup>1</sup>H NMR spectra of compound **2k**

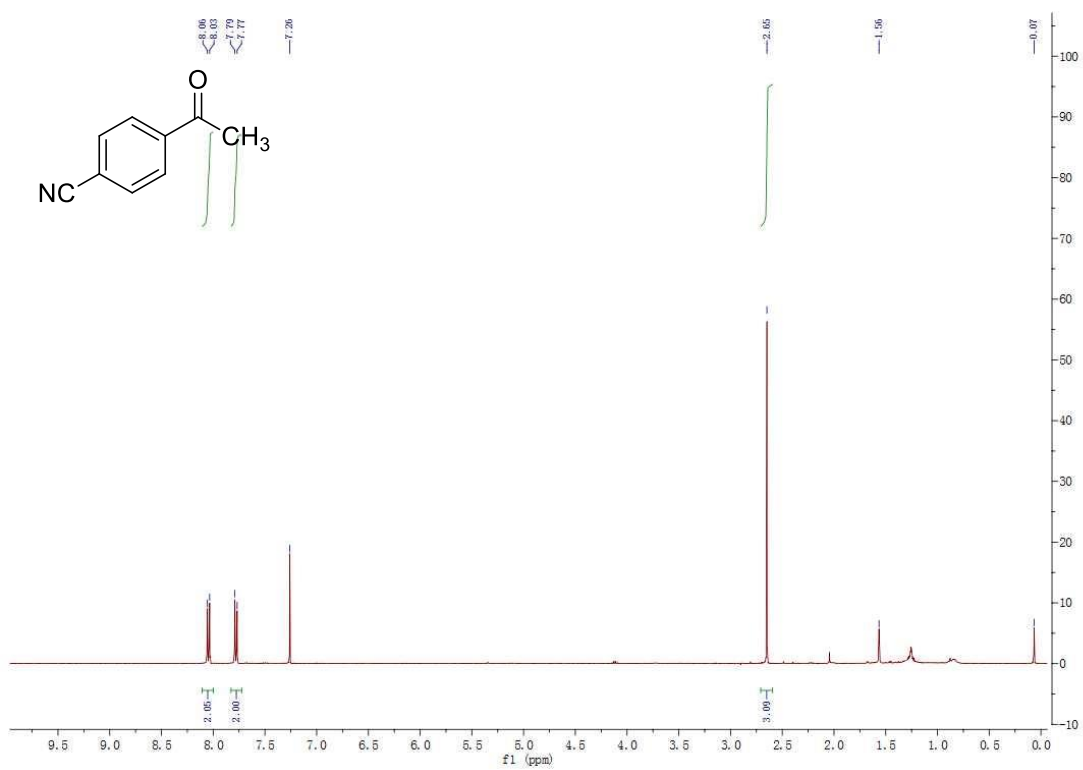

<sup>1</sup>H NMR spectra of compound **2l**

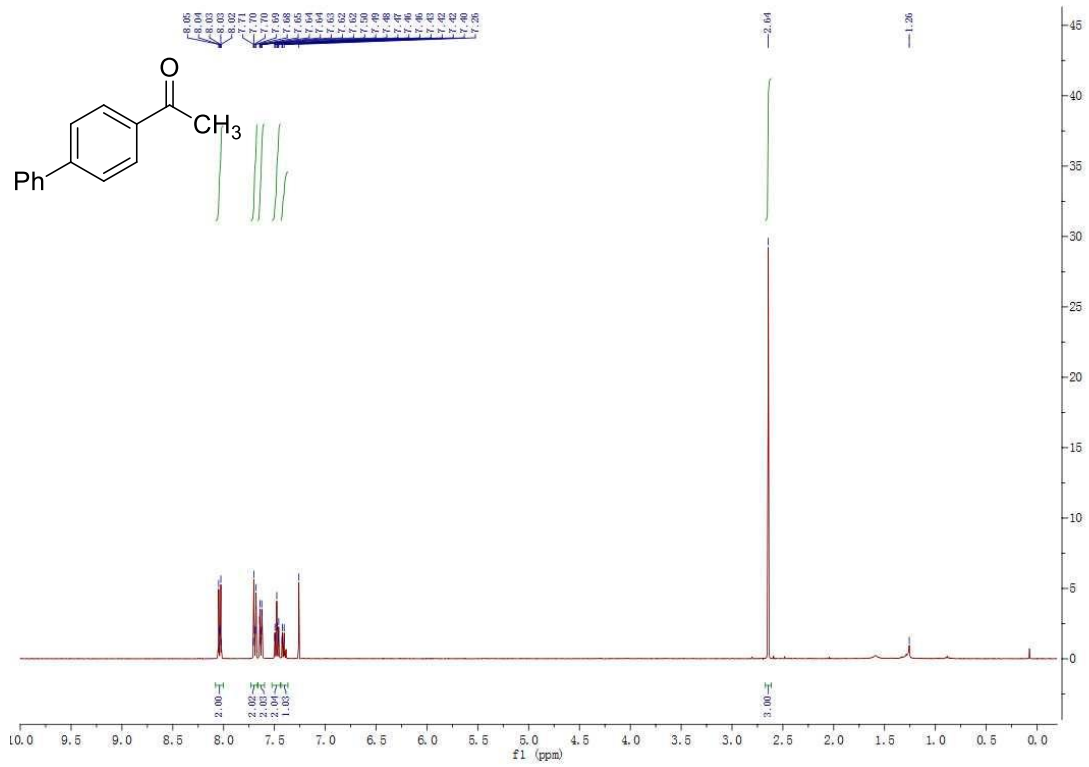

<sup>1</sup>H NMR spectra of compound **2m**

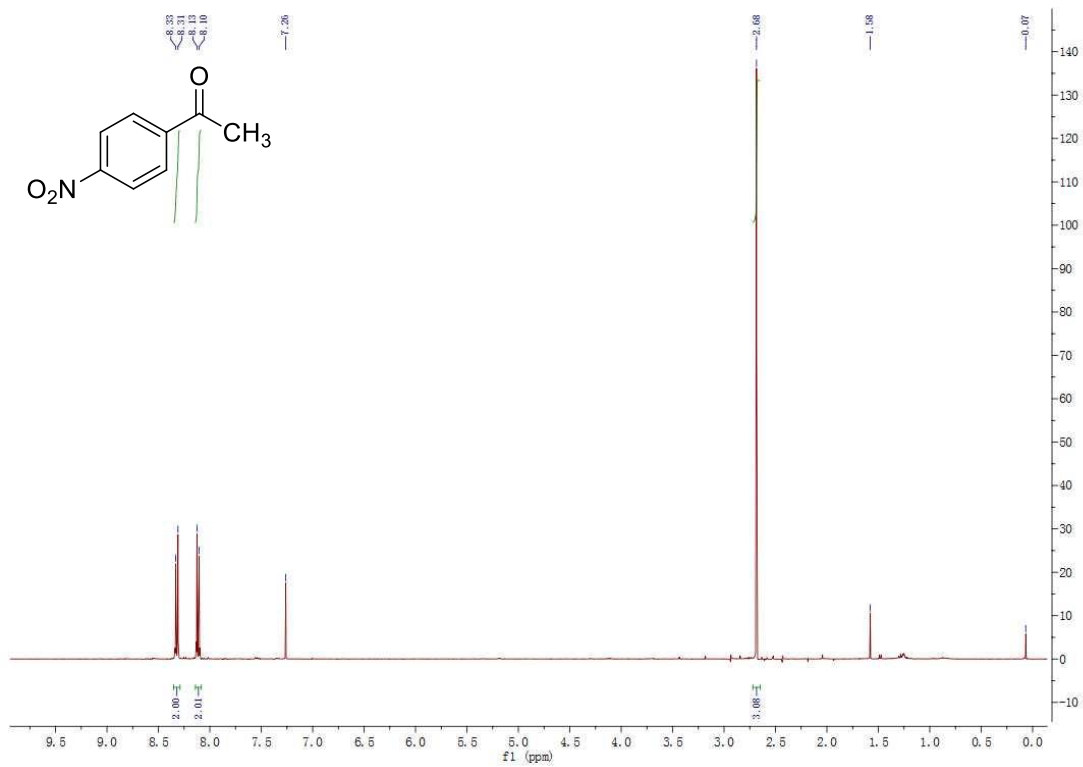

### <sup>1</sup>H NMR spectra of compound 2o

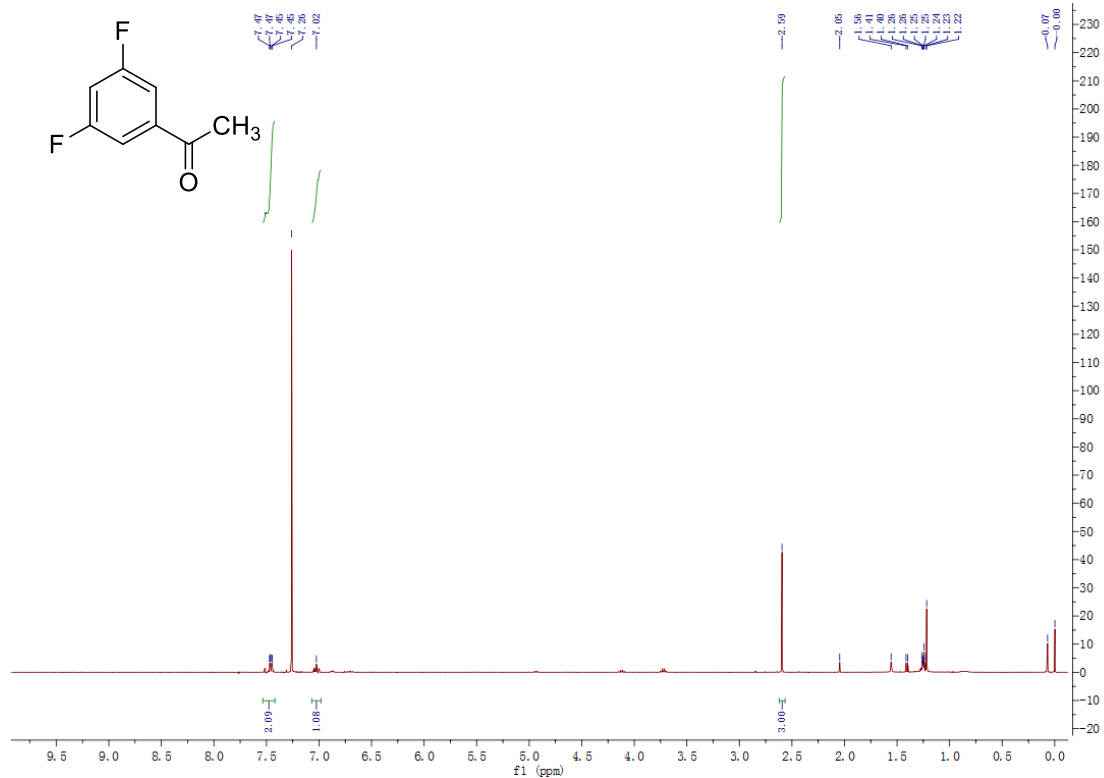

### <sup>1</sup>H NMR spectra of compound 2p

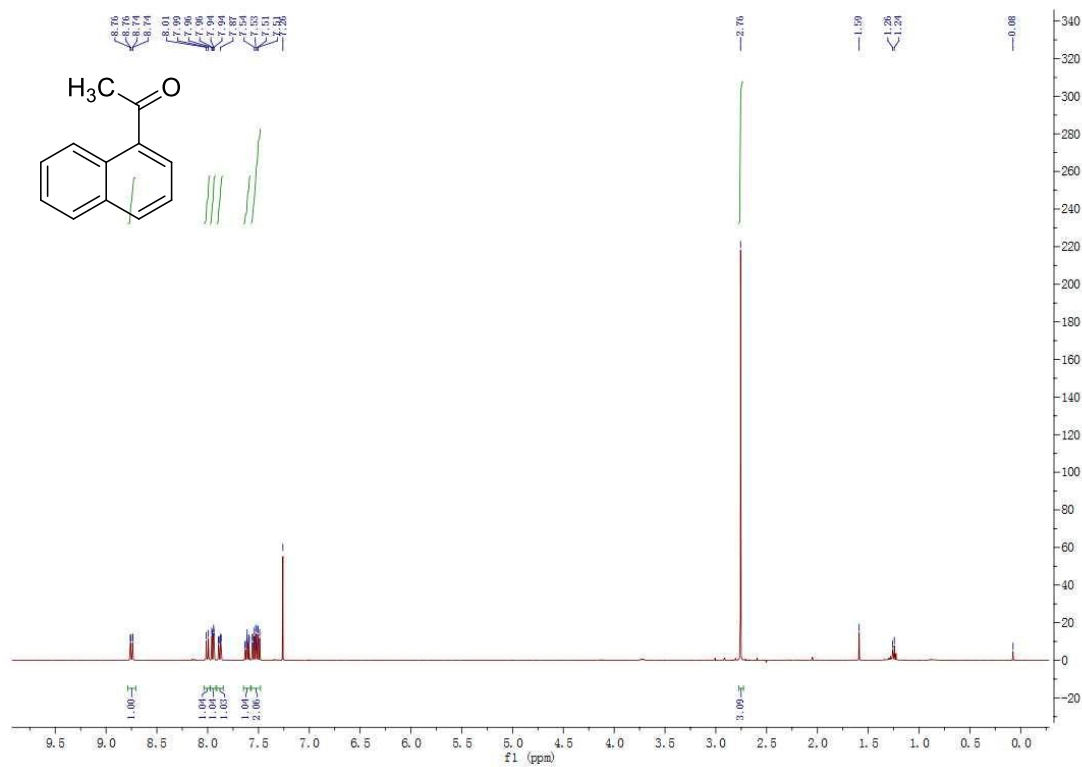

### <sup>1</sup>H NMR spectra of compound **2q**

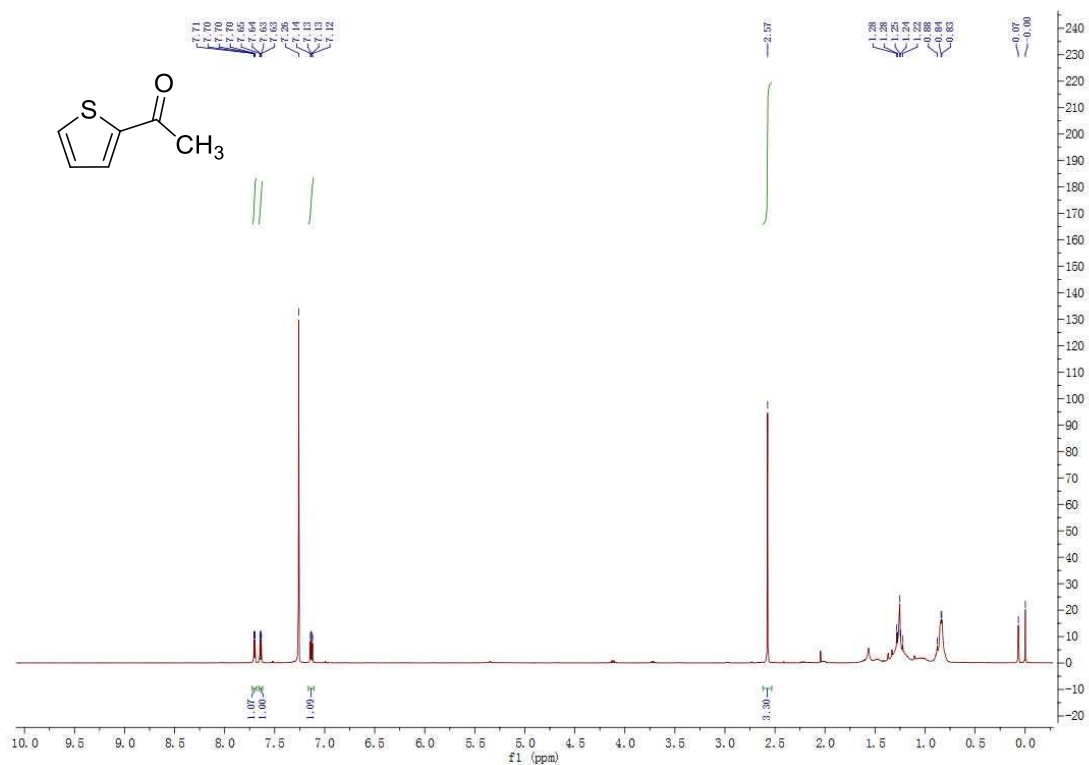

### <sup>1</sup>H NMR spectra of compound **2r**

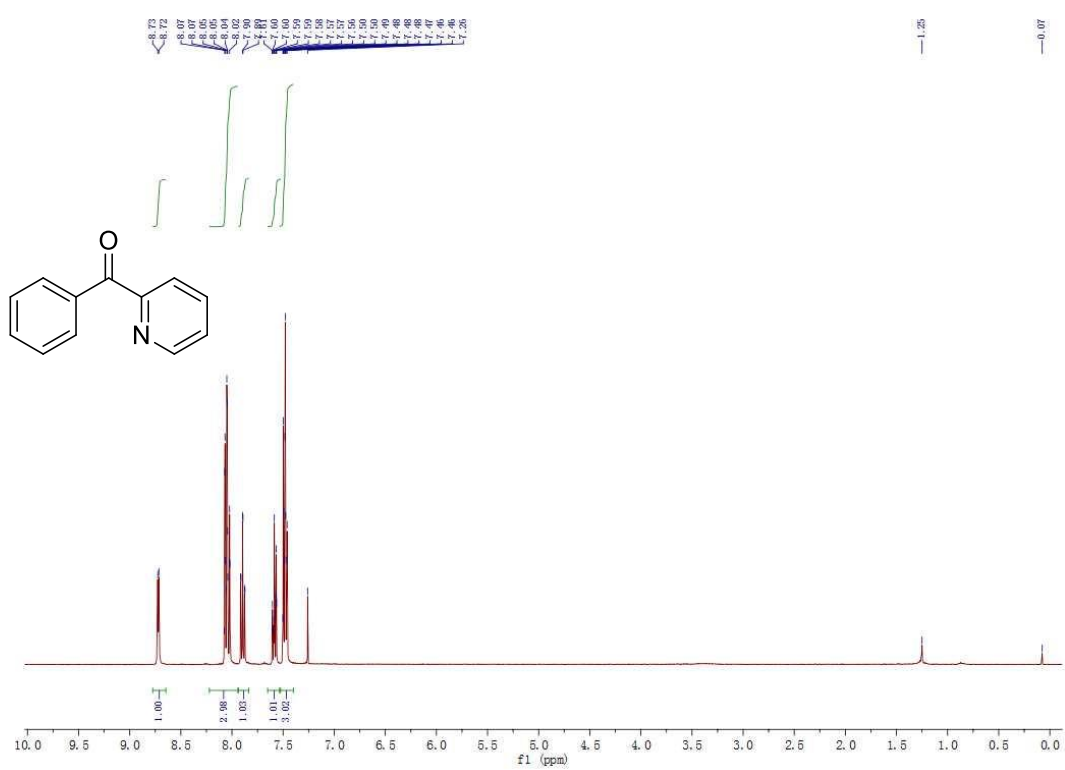



### <sup>1</sup>H NMR spectra of compound 2s

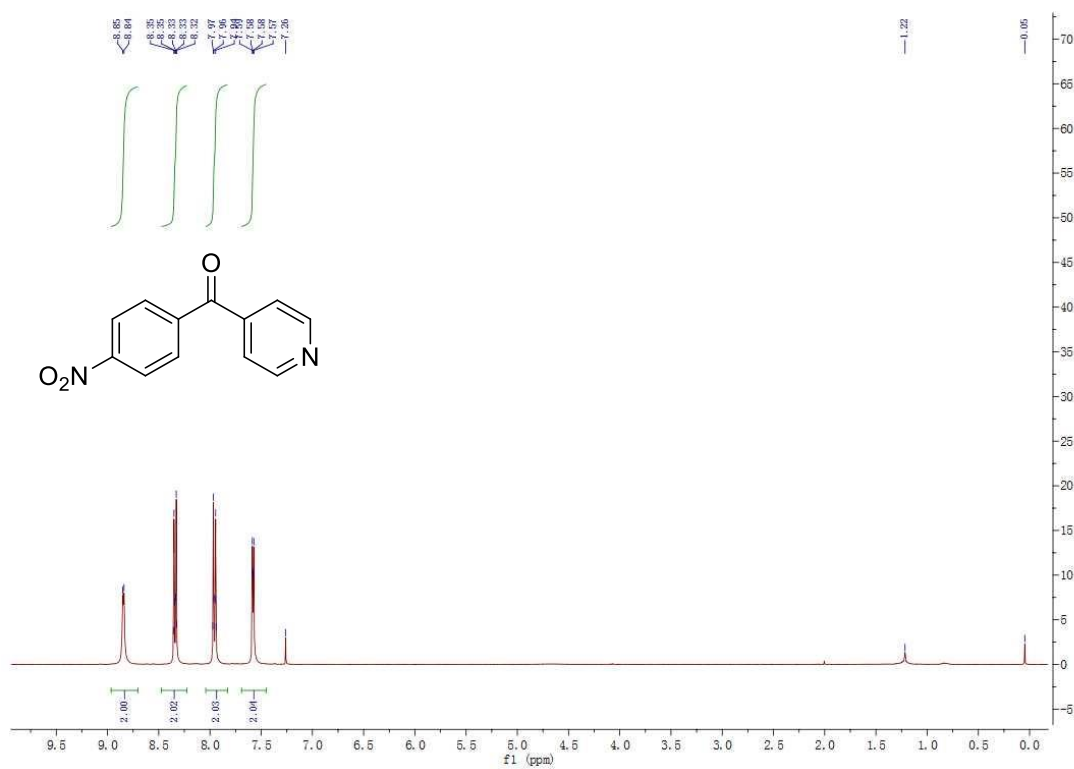

### <sup>1</sup>H NMR spectra of compound 2t

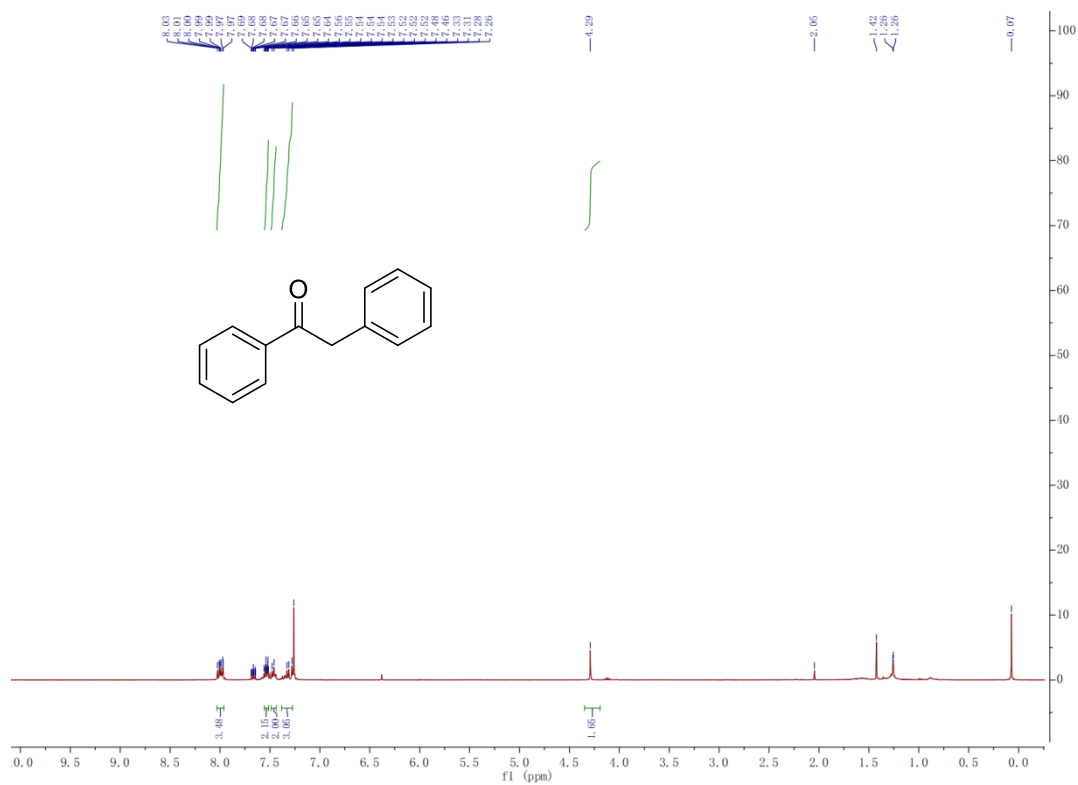



<sup>1</sup>H NMR spectra of compound **6b**

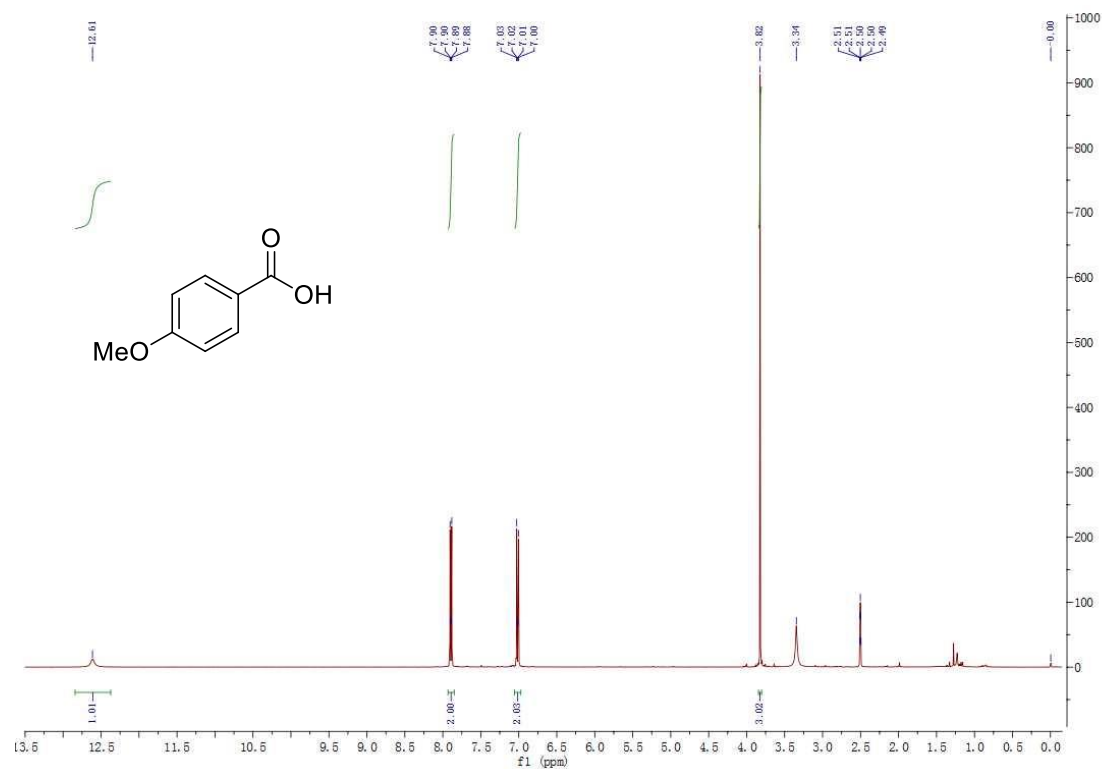

<sup>1</sup>H NMR spectra of compound **6c**

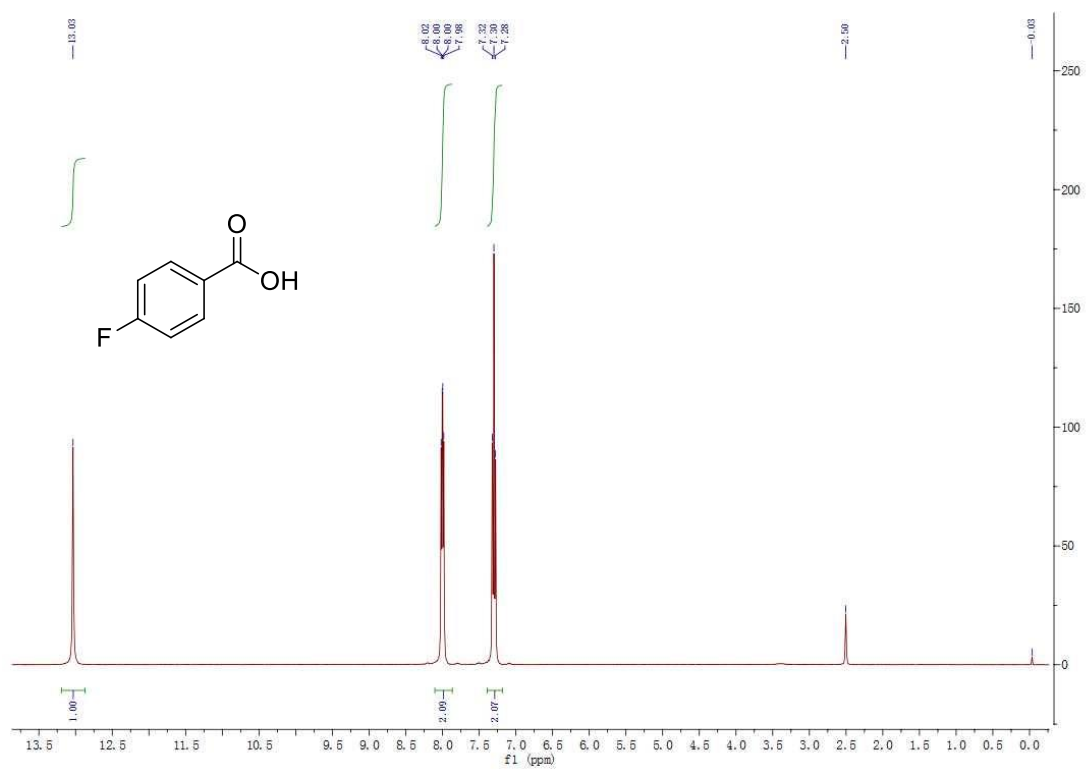

<sup>1</sup>H NMR spectra of compound **6d**

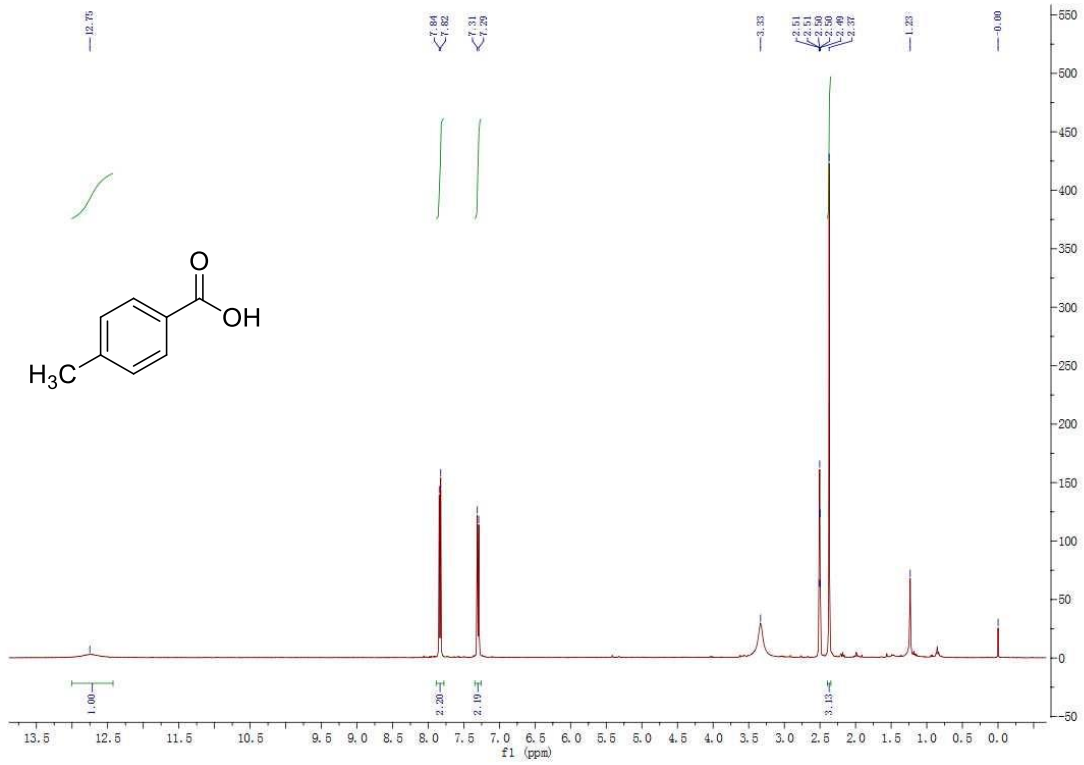

<sup>1</sup>H NMR spectra of compound **6e**

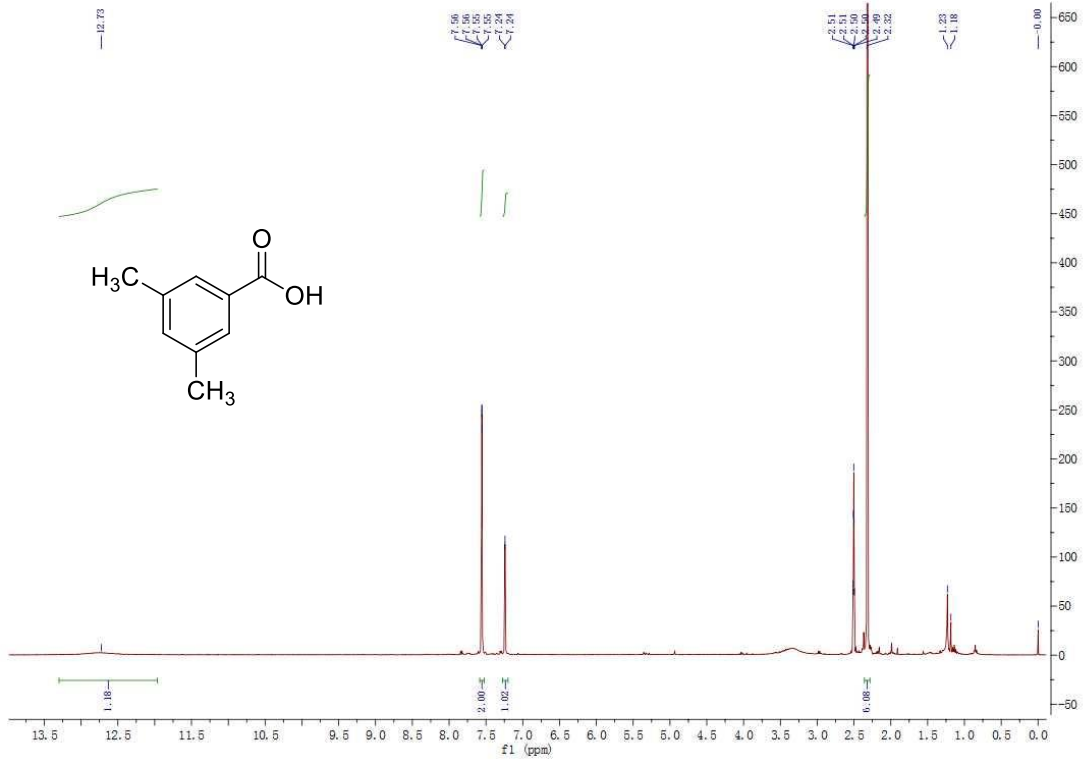

<sup>1</sup>H NMR spectra of compound **6u**

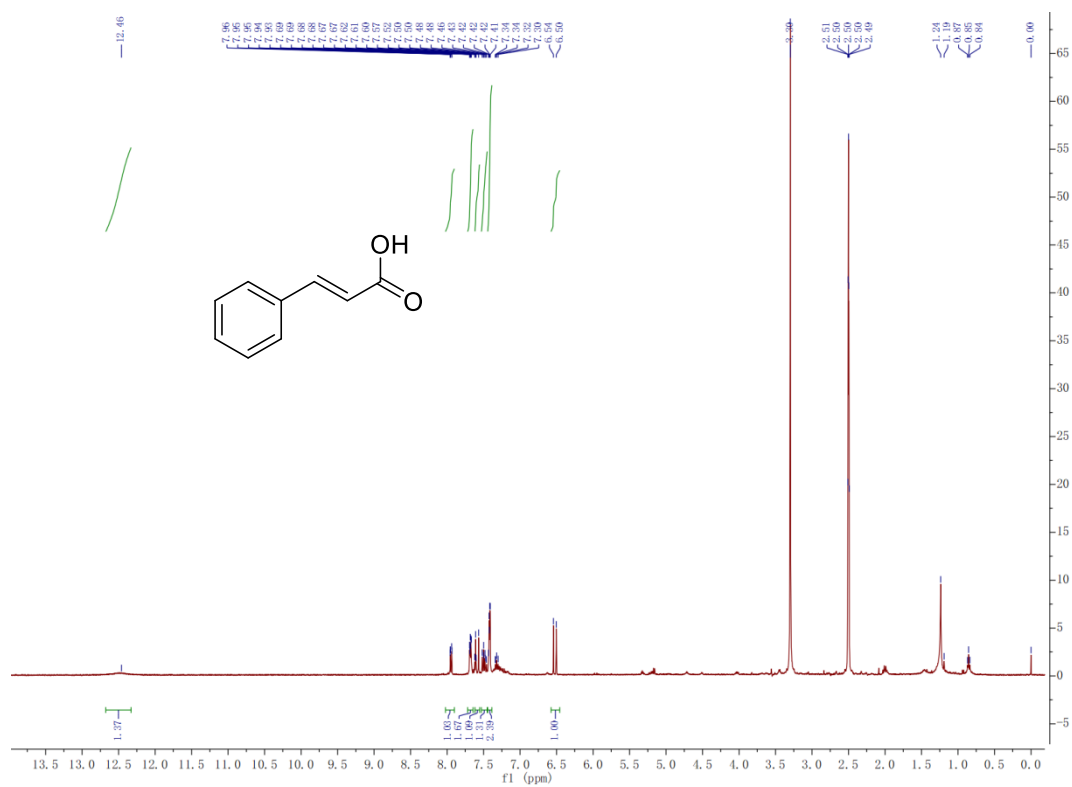

<sup>1</sup>H NMR spectra of compound **6v**

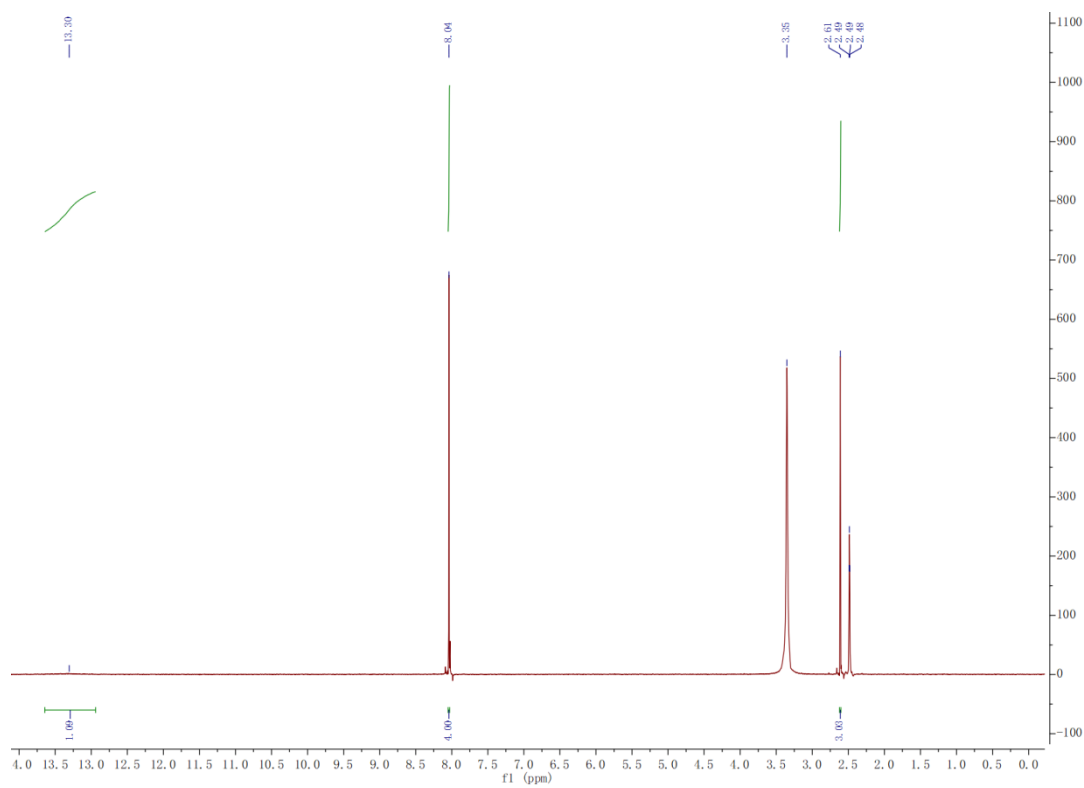

### MS spectra of compound 2a

谱库

<< 目标组分 >>

行号#:1 保留时间:5.530(扫描数#:707) 质量峰:566  
原始模式:单个 5.530(707) 基峰:132.20(10000)  
背景模式:无 组 1 - 事件 1 Scan

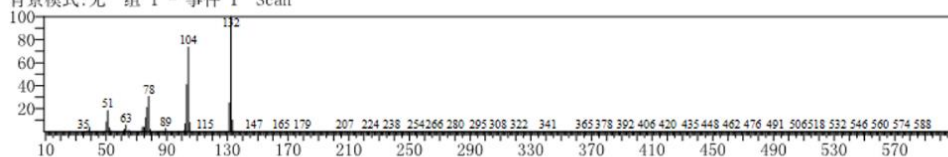

命中#:2 输入:23154 谱库:WILEY7.LIB  
SI:96 分子式:C9 H8 O CAS:83-33-0 摩尔质量:132 保留指数:0  
组分名称:1H-Inden-1-one, 2,3-dihydro- (CAS) 1-Indanone \$\$ 1-Indone \$\$ Indanone \$\$ .alpha.-Indanone \$\$ .alpha.-Hydrindone \$\$ 2,3-Dihydro-1-indenone \$\$ Indanone-(1) \$\$ 2,3-Dihydro-1H-inden-1-one \$\$

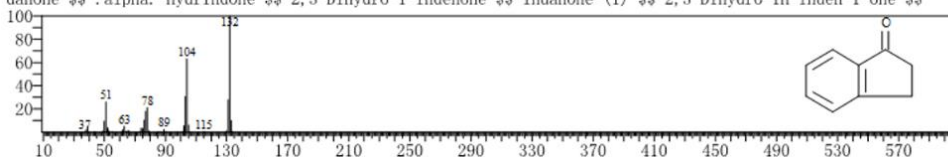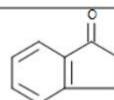

### MS spectra of compound 3a

谱库

<< 目标组分 >>

行号#:1 保留时间:5.045(扫描数#:610) 质量峰:553  
原始模式:单个 5.045(610) 基峰:133.20(10000)  
背景模式:无 组 1 - 事件 1 Scan

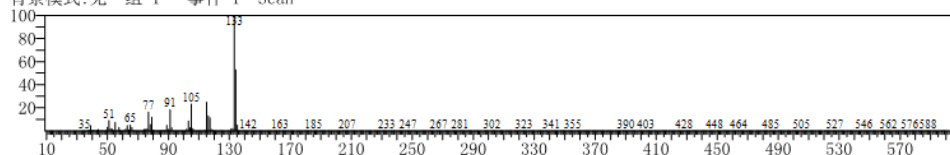

命中#:1 输入:6166 谱库:NIST11s.lib  
SI:95 分子式:C9H10O CAS:6351-10-6 摩尔质量:134 保留指数:1235  
组分名称:1H-Inden-1-ol, 2,3-dihydro- \$\$ 1-Indanol \$\$ Indan-1-ol \$\$ 1-Indanole \$\$ 1-Hydroxyhydrindene \$\$ 2,3-Dihydro-1H-inden-1-ol \$\$

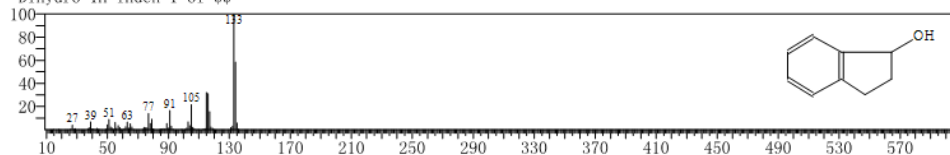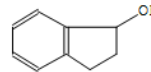

### MS spectra of compound 4a

谱库

<< 目标组分 >>

行号#:1 保留时间:6.970(扫描数#:995) 质量峰:561  
原始模式:单个 6.970(995) 基峰:148.15(10000)  
背景模式:无 组 1 - 事件 1 Scan

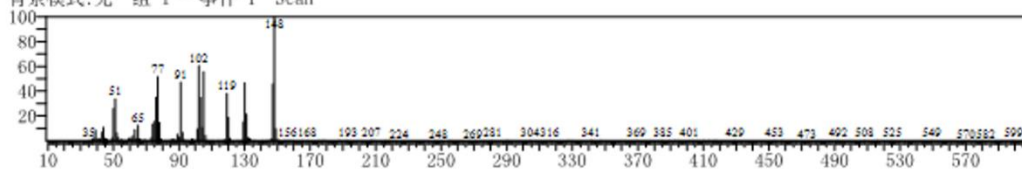

命中#:1 输入:35890 谱库:WILEY7.LIB  
SI:88 分子式:C9 H8 O2 CAS:14381-41-0 摩尔质量:148 保留指数:0  
组分名称:BICYCLO[4.2.0]OCTA-1,3,5-TRIENE-7-CARBOXYLIC ACID \$\$

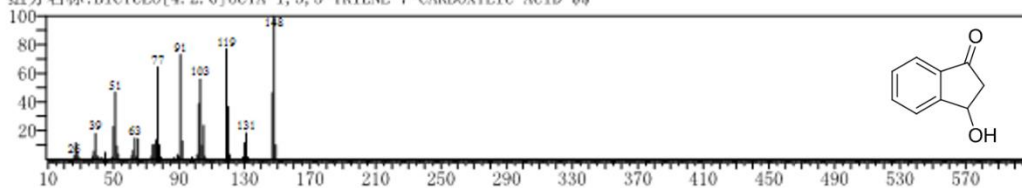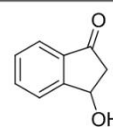

### MS spectra of compound 5a

谱库

<< 目标组分 >>

行号#:1 保留时间:6.145(扫描数#:830) 质量峰:563

原始模式:单个 6.145(830) 基峰:146.15(10000)

背景模式:无 组 1 - 事件 1 Scan

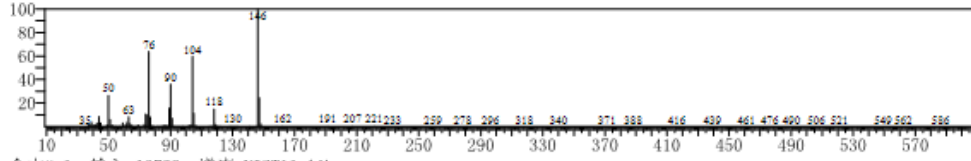

命中#:1 输入:13799 谱库:NIST11.lib

SI:96 分子式:C9H6O2 CAS:606-23-5 摩尔质量:146 保留指数:1389

组分名称:1H-Indene-1,3(2H)-dione \$\$ 1,3-Indandione \$\$ 1,3-Diketohydrindene \$\$ 1,3-Indanedione \$\$ 1,3-Indanone \$\$ Diketohydrindene \$\$ Indanedione-(1,3) \$\$ Indandione \$\$

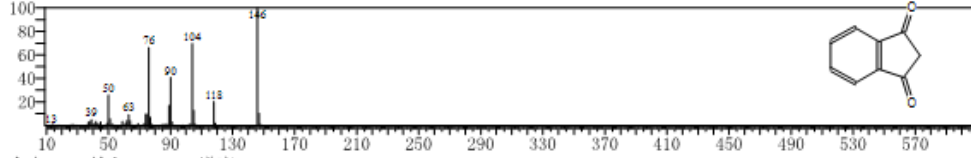

MS spectra of compound 6a

谱库

<< 目标组分 >>

行号#:1 保留时间:5.760(扫描数#:753) 质量峰:566

原始模式:单个 5.760(753) 基峰:104.10(10000)

背景模式:无 组 1 - 事件 1 Scan

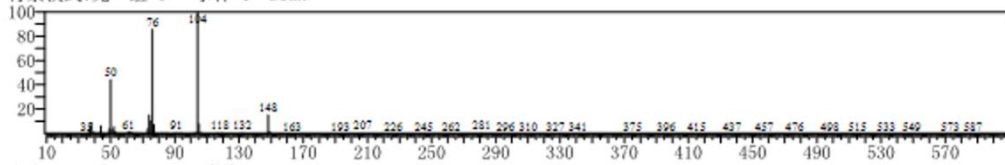

命中#:2 输入:11893 谱库:NIST11s.lib

SI:96 分子式:C8H6O4 CAS:88-99-3 摩尔质量:166 保留指数:1620

组分名称:1,2-Benzenedicarboxylic acid \$\$ Phthalic acid \$\$ o-Benzenedicarboxylic acid \$\$ o-Dicarboxybenzene \$\$ Benzene-1,2-dicarboxylic acid \$\$ o-Phthalic acid \$\$ Acide phtalique \$\$ Kyselina ftalova \$\$ Sunftal 20 \$\$ Orthophthalic acid \$\$

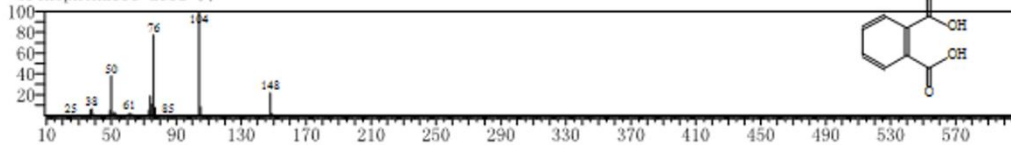

Supplement: c7cc09602j1.pdf [file c7cc09602j1.pdf]
